# 1 **Genomic analyses provide insights into peach local** 2 **adaptation and responses to climate change**

3  
4 Yong Li<sup>1,2,8</sup>, Ke Cao<sup>1,8</sup>, Nan Li<sup>3</sup>, Gengrui Zhu<sup>1</sup>, Weichao Fang<sup>1</sup>, Changwen Chen<sup>1</sup>, Xinwei Wang<sup>1</sup>, Xiuli  
5 Zeng<sup>4</sup>, Jian Guo<sup>1</sup>, Shanshan Zhang<sup>4</sup>, Qi Wang<sup>1</sup>, Tiyu Ding<sup>1</sup>, Jiao Wang<sup>1</sup>, Liping Guan<sup>1</sup>, Junxiu Wang<sup>1</sup>,  
6 Kuozhan Liu<sup>1</sup>, Wenwu Guo<sup>2</sup>, Pere Arús<sup>7</sup>, Sanwen Huang<sup>3</sup>, Zhangjun Fei<sup>5,6</sup> and Lirong Wang<sup>1</sup>

7  
8 <sup>1</sup>Zhengzhou Fruit Research Institute, Chinese Academy of Agricultural Sciences, Zhengzhou, China

9 <sup>2</sup>Key Laboratory of Horticultural Plant Biology (Ministry of Education), College of Horticulture &  
10 Forestry Sciences, Huazhong Agricultural University, Wuhan, China

11 <sup>3</sup>Agricultural Genome Institute at Shenzhen, Chinese Academy of Agricultural Sciences, Shenzhen,  
12 China

13 <sup>4</sup>Tibet Academy of Agricultural and Animal Husbandry Sciences, Lhasa, China

14 <sup>5</sup>Boyce Thompson Institute for Plant Research, Cornell University, Ithaca, New York, USA

15 <sup>6</sup>U.S. Department of Agriculture-Agricultural Research Service, Robert W. Holley Center for Agriculture  
16 and Health, Ithaca, New York, USA.

17 <sup>7</sup>IRTA–Centre de Recerca en Agrigenòmica (CSIC-IRTA-UAB-UB), Barcelona, Spain

18 <sup>8</sup>These authors contributed equally to this work.

## 19 20 **Corresponding author:**

21 Lirong Wang

22 Tel: +86 371 55906989

23 E-mail: wanglirong@caas.cn

24 Zhangjun Fei

25 Tel: +1 607 254 3234

26 E-mail: zf25@cornell.edu

27  
28 **Running title:** Genetic bases of peach local adaptation

29  
30 **Key words:** Peach, Whole-genome selection scan, Genome-wide environmental association study,  
31 Local adaptation, Adaptive evolution, Climate change

32  
33

34 **The environment has constantly shaped plant genomes, but the genetic bases underlying**  
35 **how plants adapt to environmental influences remain largely unknown. We constructed a**  
36 **high-density genomic variation map by re-sequencing genomes of 263 geographically**  
37 **representative peach landraces and wild relatives. A combination of whole-genome**  
38 **selection scans and genome-wide environmental association studies (GWEAS) was**  
39 **performed to reveal the genomic bases of peach local adaptation to diverse climates**  
40 **comprehensively. A total of 2,092 selective sweeps that underlie local adaptation to both**  
41 **mild and extreme climates were identified, including 339 sweeps conferring genomic**  
42 **pattern of adaptation to high altitudes. Using GWEAS, a total of 3,496 genomic loci strongly**  
43 **associated with 51 specific environmental variables were detected. The molecular**  
44 **mechanism underlying adaptive evolution of high drought, strong UV-B, cold hardiness,**  
45 **sugar content, flesh color, and bloom date were revealed. Finally, based on 30 years of**  
46 **observation, a candidate gene associated with bloom date advance, representing peach**  
47 **responses to global warming, was identified. Collectively, our study provides insights into**  
48 **molecular bases of how environments have shaped peach genomes by natural selection**  
49 **and adds valuable genome resources and candidate genes for future studies on**  
50 **evolutionary genetics, adaptation to climate changes, and future breeding.**

51  
52 Environmental adaptation is fundamental to species survival and conservation of biodiversity,  
53 especially under threats of climate change (Blanquart et al. 2013). Unlike animals, which can  
54 escape from hostile environments, plants are sessile and have to adapt by shaping and/or fixing  
55 genetic variants that are conducive for survival. Generally, climate is the major selective pressure  
56 driving adaptive evolution, resulting in different ecotypes within a single species (Hancock et al.  
57 2011; Fournier-Level et al. 2011). However, the mechanisms underlying how climate shapes plant  
58 genomes remain largely unclear. Recently, identifying adaptive variants and understanding  
59 molecular mechanism of adaptation across a genome have become tractable due to the advances  
60 of sequencing technologies. Recent studies have sought to elucidate genetic bases of adaptation  
61 through genome-wide identification of regions under positive selection and/or loci that control  
62 adaptive traits in *Arabidopsis thaliana* (Fournier-Level et al. 2011), rice (Yan et al. 2013), sorghum  
63 (Lasky et al. 2015), and poplar (Wang et al. 2018). However, no study has focused on genetic  
64 bases of adaptation in domesticated perennial fruit crops. Domesticated crops have adapted to  
65 diverse climates during domestication and subsequent spread, and show local adaptation through  
66 long-term natural selection. Landraces and wild relatives harbor great genetic diversity and an  
67 abundance of resistance genes, which provide excellent resources for breeding initiatives. This is

68 especially the case with accessions originating from stressful environments that may have specific  
69 stress-resistance genes (Bolger et al. 2014a). However, a cost of domestication is that many  
70 resistance related genes have been lost. In addition, global climate change is driving decreases  
71 in productivity and distribution changes in several crop species (Tim and Braun, 2013). Therefore,  
72 it is of great importance to identify adaptive genes that can contribute to crop improvement,  
73 species survival, and global food security in the face of environmental deterioration.

74 Peach is an important temperate fruit species, with a global yield of 24.7 million tons in  
75 2017 (FAOSTAT; <http://www.fao.org/faostat>). It is also an important model system for the  
76 Rosaceae family, members of which provide one of world's main resources of fruits. Peach  
77 originated in southwestern China, and its landraces and wild relatives are widespread in both  
78 temperate and sub-tropical regions, as well as in wet and dry climates (Wang et al. 2012). On the  
79 grounds of wide distributions, peach can be regarded as an excellent material for studying  
80 adaptation genetics. Peach has a relatively small genome size (~227.4 Mb) (Verde et al. 2013)  
81 and genomic analyses have identified a number of loci and candidate genes associated with  
82 human selection and agronomically important traits (Cao et al. 2014; Cao et al. 2016; Li et al.  
83 2019). However, there have been few studies describing genomic loci associated with  
84 environmental adaptation and natural selection.

85 To investigate the genetic basis of local adaptation, we sequenced a wide collection of 263  
86 peach accessions from a broad range of geographical origins and associated with diverse  
87 climates, spanning mild and extreme environments. Using the sequencing data, we deciphered  
88 adaptive patterns across peach genome by combining the identification of signatures of selective  
89 sweeps with genome-wide association studies of environmental variables and adaptive traits.  
90 Finally, we identified a candidate gene associated with peach responses to global warming, based  
91 on observations over a 30-year period.

92

## 93 **Results and discussion**

### 94 **Genomic variation map and population structure**

95 We first constructed a genome variation map for peach using a collection of 263 diverse  
96 accessions (Fig. 1A), consisting of 52 wild relatives and 211 landraces (Supplementary Table S1),  
97 which collectively capture more than 95% of geographic diversity of native distribution of peach  
98 landrace and wild relatives. A total of 342.7 Gb of sequence was generated, with a median depth  
99 of  $5.3 \times$  and coverage of 91.7% of reference peach 'Lovell' genome (release v2.0) (Verde et al.  
100 2013) (Supplementary Table S1). We identified a final set of 4,611,842 high-quality single-

101 nucleotide polymorphisms (SNPs) (Supplementary Fig. S1A), of which 1,931,310 were intronic  
102 (~11.33%) and 848,638 (~4.98%) were exonic. Among SNPs in coding sequence, we found that  
103 7,853 SNPs present in 5,512 peach genes (~20.5% of total genes) are likely to have a major  
104 impact on gene function. The accuracy of identified SNPs was found to be ~95.6%, based on  
105 genotyping of 18 randomly selected SNPs in 130 accessions using a Sequenom MassARRAY  
106 platform (Supplementary Table S2). In addition, we identified 1,049,266 small insertions and  
107 deletions (INDELs) (shorter than or equal to 6 bp) and 106,388 large structural variations (SVs)  
108 (> 30 bp) (Supplementary Fig. S1A).

109 We explored the genetic relationships among 263 accessions using 2,468,307 SNPs with  
110 minor allele frequency (MAF) greater than 0.05. Based on the neighbor-joining tree and population  
111 structure analysis, the 263 peach accessions could be divided into seven major groups, which  
112 were largely congruent with ecotypes classified according to their geographic information,  
113 including YG (Yun-gui Plateau), NW (Northwest China), NP (North Plain China), YT (Yangtze  
114 River Middle and Backward), NE (Northeast China), TB (Tibet plateau), and ST (South China  
115 Sub-tropical) groups (Supplementary Fig. S1B, Supplementary Fig. S2, and Supplementary Table  
116 S1). Although the neighbor-joining tree largely supported the division of seven major groups, there  
117 were some discrepancies between geographical characterization and phylogenetic clustering  
118 (Supplementary Fig. S2D), indicating shared ancestral variation and historical gene flow among  
119 landraces in closely related groups. Moreover, principal component analysis (PCA) and model-  
120 based clustering analyses also supported the extensive admixture and possible gene flow among  
121 landrace groups (Supplementary Fig. S2E and S2F). Furthermore, we found the small pair-wise  
122 genetic differentiation ( $F_{ST}$ ) values between different landrace groups, again consistent with  
123 population admixture (Supplementary Fig. S2G).

124 Using the demographic analysis with the pairwise sequential Markovian coalescent (PSMC)  
125 model (Li and Durbin 2011), we found the sharply decline of effective population size ( $N_e$ ) during  
126 the two largest Pleistocene glaciations: the Xixiabangma glaciation (1.17-0.8 MYA) and  
127 Naynayxungla glaciation (0.78-0.50 MYA), and a slight decline of  $N_e$  during the last glacial  
128 maximum (~20,000 years ago) (Fig. 1B).

129  
130  
131  
132  
133  
134

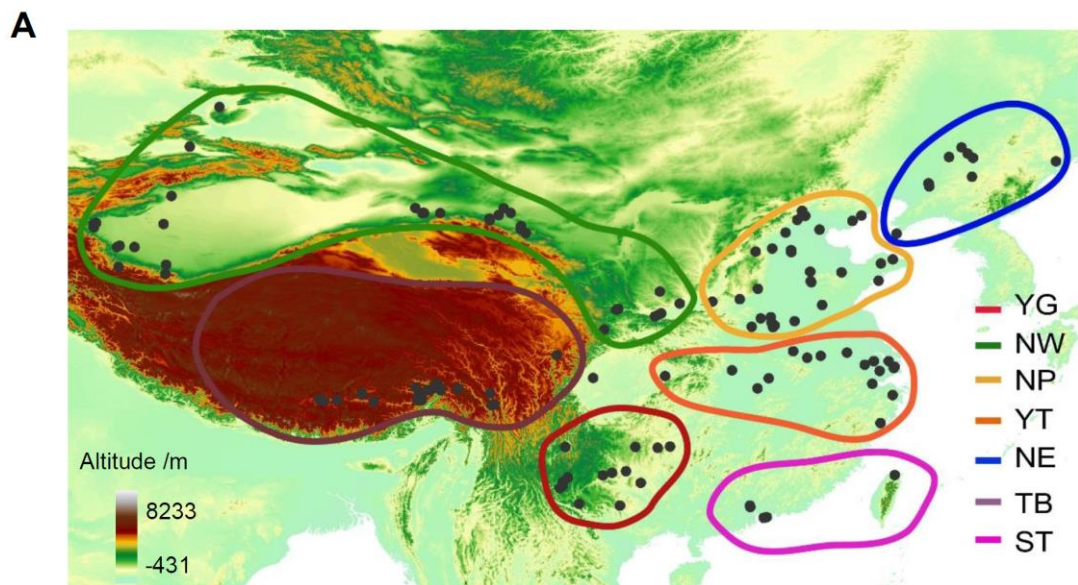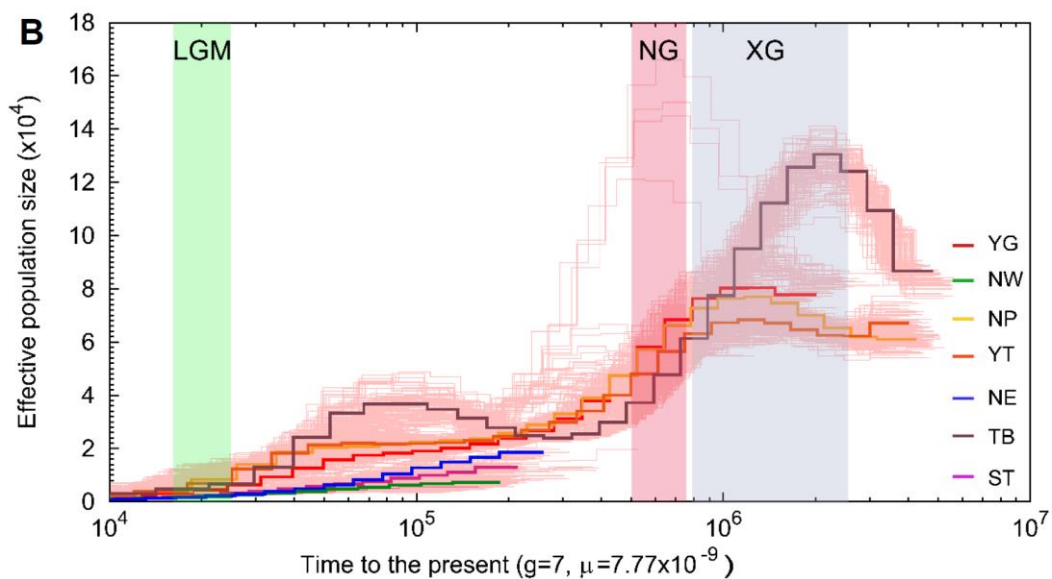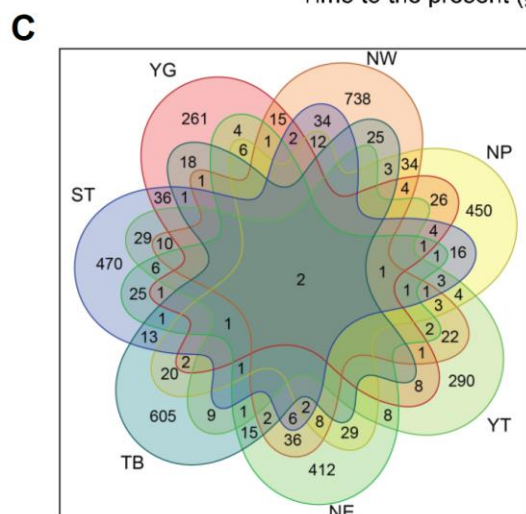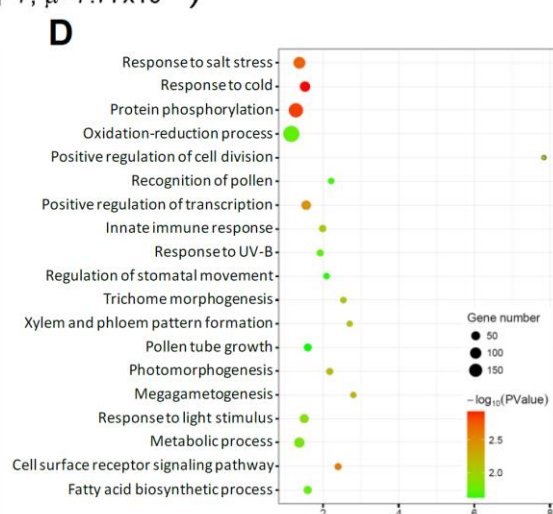

136 **Fig. 1 Summary of 263 samples and genes under selection for seven peach groups. (A)**  
137 **Geographic distribution of 263 peach accessions used in this study. Each accession is represented**  
138 **by a dot on the world map. Seven ecotypes are highlighted using rings with different colors. (B)**  
139 **Demographic history of the seven peach groups. Ancestral population size was inferred using the**  
140 **PSMC model. Three periods of the last glacial maximum (LGM, ~20 KYA), Naynayxungla Glaciation**  
141 **(NG, 0.5~0.78 MYA), and Xixiabangma Glaciation (XG, 0.8~0.17 MYA) are shaded in green, red, and**  
142 **blue, respectively. (C) Venn diagram showing the number of genes under selection in the seven**  
143 **groups. (D) Over-represented gene ontology (GO) terms in overall selection regions. Only the top 20**  
144 **most over-represented terms are shown. YG, Yun-gui Plateau. NW, Northwest China. NP, North Plain**  
145 **China. YT, Yangtze River Middle and Backward. NE, Northeast China. TB, Tibet plateau. ST, South**  
146 **China Sub-tropical.**

147

### 148 **Selective sweeps related to adaptation to diverse environments**

149 Peach accessions of each group have adapted locally through long-term selection under local  
150 environments (Supplementary Table S3). To identify genomic loci that favor local adaptation for  
151 seven groups, we detected signatures of selective sweeps for each group. This revealed a total  
152 of 2,092 genomic regions (19.1 Mb, ~8.4%; 189, 387, 301, 235, 280, 339, and 378 regions for the  
153 YG, NW, NP, YT, NE, TB, and ST groups, respectively) (Supplementary Fig. S3), which were  
154 termed candidate selection regions (CSRs) (Supplementary Table S4). The overall CSRs  
155 harbored 4,198 genes (~17.5%), including 506, 1,197, 835, 530, 747, 920, and 869 genes for the  
156 YG, NW, NP, YT, NE, TB, and ST groups, respectively (Fig. 1C). Selections on these genes may  
157 underlie the adaptation to different climates. Notably, we found that few genes were shared among  
158 different groups (Fig. 1C), suggesting the unique adaptive patterns for each group and that  
159 different climates may shape distinct genomic regions.

160 We found that genes related to response to different types of stimuli and stress, including  
161 temperature, radiation, salt, DNA damage, osmotic, toxin, were overrepresented ( $P < 0.05$ ),  
162 suggesting that stress-related genes have participated in adaptive evolution (Fig. 1D,  
163 Supplementary Table S5). For instance, two cation/H<sup>+</sup> exchanger family genes (*CHX*)  
164 (*Prupe.6G251600* and *Prupe.6G251700*) and one *salt overly sensitive 3* (*SOS3*)  
165 (*Prupe.2G188700*) gene showed high reduction of diversity (ROD) and  $F_{ST}$  values in the NW  
166 group. Homologs of these genes are involved in salt resistance in *A. thaliana* (Monihan et al.  
167 2016), suggesting their potential contributions to adaptation to saline soils in northwestern China.  
168 The resistance-related LRR (leucine-rich repeat) domain and PPR (pentatricopeptide repeat)  
169 gene family were highly enriched in CSRs ( $P < 0.05$ ) (Supplementary Table S5). The LRR domain,

170 which is considered to be one of the most important domains for plant resistance genes, was also  
171 enriched ( $P < 0.05$ ), with 121 of 612 members (19.8%) in CSRs. PPR proteins form one of the  
172 largest protein families in land plants that are related to environmental responses, with 286  
173 members in peach genome, of which 79 (~27.6%) were in CSRs.

174 The known genes or biological pathways involved in adaptation to the environment in the  
175 habitat of each group were determined. For instance, the YG group was distributed on the Yun-  
176 gui plateau (Southwest China), a low-latitude and high-altitude (~2000 m) region with high annual  
177 precipitation ( $> 1100$  mm) and acidic soil (pH 4.5~5.5) (Supplementary Table S3). Genes related  
178 to metal ion (including potassium, iron, and zinc) binding and transport, cell membrane function,  
179 and response to toxins were overrepresented in this group (107 genes,  $P < 0.05$ ) (Supplementary  
180 Table S5), consistent with functions in overcoming cation deficiency and aluminum toxicity that  
181 are common in acidic soils (Seguel et al. 2013). For the YT group, we observed enrichments of  
182 the LRR domain (24 genes), NB-ARC domain (8 genes), and other genes related to stress  
183 responses (32 genes) ( $P < 0.05$ ) (Supplementary Table S5), in comparison to other groups. This  
184 suggests that the YT group has accumulated more abiotic and biotic stress-resistance variants  
185 due to strong selective pressures in high temperature and high humidity areas (Supplementary  
186 Table S3). These results indicate that accessions from the YT group may exhibit higher  
187 adaptability than other landrace accessions.

188

### 189 **Genome-wide environmental association studies of 51 environmental variables**

190 Although we obtained candidate genes underlying adaptation by identifying selective sweeps,  
191 many adaptive events in natural populations may occur by polygenic adaptation, which would be  
192 largely undetected by conventional methods for detecting selection (Pritchard and Di Rienzo  
193 2010). However, local adaptation can generate correlations between environmental variables  
194 (EVs) and genomic loci which can be used to detect polygenic adaptation. We investigated a total  
195 of 51 EVs of the geographic origin of each accession that are important for plant adaptation  
196 (Supplementary Table S6 and S7), representing extremes and seasonality of temperature and  
197 precipitation, latitude, altitude, relative air humidity, water vapor pressure, growing season lengths,  
198 and radiations. Using a Mantel test, we found a significant correlation between geographic and  
199 genetic distances (Pearson's  $r = 0.73$ ,  $P = 0.000999$ ), with most associations being driven by  
200 altitude. To obtain loci associated with EVs, we performed GWEAS on 51 EVs. A total of 9393  
201 association SNPs (Supplementary Table S8), involving 3807 genes, were identified (Fig. 2A).  
202 Notably, we found an EV association hotspot regions at the top of chromosome 2 that was

203 enriched with genes encoding NB-LRR proteins in peach genome (Verde et al. 2013). Consistent  
 204 with the high correlations among some climate variables (Supplementary Fig. S4), only 3496  
 205 association SNPs were unique, and ~62.8% of the associations were shared across different  
 206 types of EVs, suggesting that different EVs may shape same genomic regions. Notably, a total of  
 207 82 genomic loci associated with more than 10 EVs were identified.

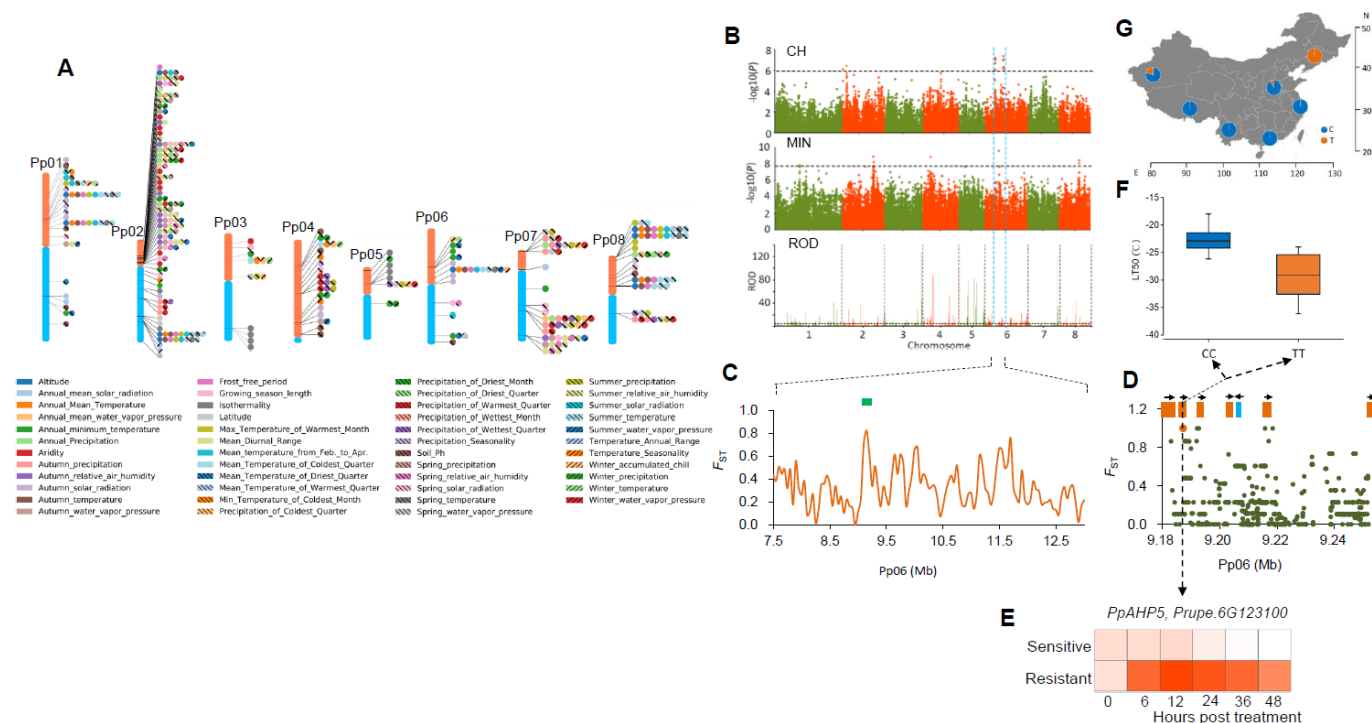

223 **Fig. 2 Genome-wide environmental association studies of 51 environmental variables and**  
 224 **genomic loci associated with winter cold adaptation. (A)** SNPs associated with environmental  
 225 variables (EVs). Only the top 10 association signals for each EV are shown. All signals were included  
 226 if the total number of signals was < 10. **(B)** The *PpAHP* locus involved in adaptation to winter low  
 227 temperature in peach. Manhattan plots for a GWAS study of cold hardiness (CH) and winter lowest  
 228 temperature (MIN), and selection signals of the NE group (ROD) were detailed. The dashed  
 229 line represents the significance threshold for each test. The candidate genomic region is highlighted  
 230 between two dashed blue vertical lines. **(C)** Distribution of  $F_{ST}$  values between NE and ST groups in  
 231 the candidate region. The green bar indicates the *PpAHP* locus. **(D)** Close-up view of the  $F_{ST}$  values  
 232 in a region corresponding to the green bar in **(C)**. This region contains six *PpAHP* homologs (orange)  
 233 and one other gene (light blue). The candidate SNP is highlighted using an orange dot. **(E)** Relative  
 234 expression changes of *PpAHP5* after cold treatment (-28°C) in resistant and sensitive cultivars. **(F)**  
 235 Association between genotypes and cold hardiness (lethal temperature of 50%, LT50). **(G)** Allele  
 236 frequencies of association locus (Pp06: 9,187,362) in *PpAHP5* across seven groups.

237



238           Next, we identified known biological processes that were overrepresented among  
239 associations for each EV and for overall EVs (Supplementary Table S9). Functional categories  
240 related to response to a series of abiotic or biotic stimuli, “programmed cell death (PCD)”, “innate  
241 immune response”, and “LRR domain” were highly overrepresented ( $P < 0.05$ ), suggesting that  
242 EVs mainly shaped genomic regions related to stress responses. Notably, a series of processes  
243 involved in secondary metabolism, including “flavonoid metabolic process”, “jasmonic acid (JA)  
244 biosynthetic process”, and “biosynthesis of plant hormones and terpenoids”, were significantly  
245 overrepresented ( $P < 0.05$ ) (Supplementary Table S9). We found that genes related to JA  
246 biosynthesis were enriched in altitude associations ( $P < 0.05$ ). Previous studies have shown that  
247 JA treatment contributes to enhanced cold resistance by promoting expression of the ICE-  
248 CBF/DREB1 transcriptional pathway, while a mutation in a key JA biosynthesis gene, *LOX1*  
249 (*Prupe.6G324400*, an altitude association gene in this study), leads to cold hypersensitive  
250 phenotypes (Hu et al. 2013). For each EV, several known biological processes were  
251 overrepresented (Supplementary Table S9). For instance, genes involved in ion transport were  
252 highly enriched in those associated with soil pH ( $P < 0.05$ ), as soil pH affects absorption of metal  
253 ions in plants (Harter 1983).

254           Temperature and precipitation are two of the most important EVs that affect plant  
255 distribution and survival. We identified temperature associated SNPs, distributed across all eight  
256 peach chromosomes, and five association hotspots on chromosome 1, 2, 5, 6, and 8 were  
257 detected in GWEAS for more than nine temperature-related EVs and altitude (Supplementary Fig.  
258 S5A and 5B). Tolerance to low temperature in winter is a major factor that restricts the spread of  
259 peach to extremely cold regions (north of 40 °N). To characterize genetic loci underlying  
260 adaptation to extremely cold climates in peach, we performed a GWAS analysis of cold hardiness  
261 and identified four association peaks, on chromosomes 2, 4, 6, and 7 (Fig. 2B). Of these, the peak  
262 on chromosome 6 showed a strong selection signal, with sharp ROD in the NE group that  
263 experienced an extreme cold winter (lowest temperature  $< -30$  °C) (Fig. 2B). Moreover, this peak  
264 overlapped with the temperature association hotspot on chromosome 6 and association peaks of  
265 annual lowest temperature (Fig. 2B). The NE group ( $n = 19$ ) inhabits areas north of 40 °N that  
266 have extremely low winter temperatures, while the ST group ( $n = 14$ ) grows in a contrasting  
267 climate, south of 25 °N in areas with a warm winter (lowest temperature  $> 10$  °C). We searched for  
268 genomic regions and SNPs with extremely high differentiation between ST and NE groups. One  
269 (Pp06: 9,187,362) of these SNPs ( $F_{ST} = 1$ ) resided within the overlapping intervals between  
270 annual lowest temperature and cold hardiness associations (Fig. 2C). This SNP was located in  
271 the gene *PpAHP5* (*Prupe.6G123100*), belonging to a gene cluster encoding six histidine

272 phosphotransfer proteins (AHP) (Fig. 2D), which have been reported to be involved in mediating  
273 cold signaling in *A. thaliana* (Jeon and Kim 2013). Using cold treatment, we found this gene was  
274 up-regulated by cold and resistance cultivars harbored significantly high expression level than  
275 sensitive one (Fig. 2E). At this SNP locus, all representative accessions in the NE group showed  
276 a distinct genotype (TT) compared with the ST group (CC) (Fig. 2F), indicating that the TT  
277 genotype in *PpAHP5* is favored in high-altitude cold regions (Fig. 2G), and that *PpAHP5* is a  
278 candidate for conferring cold resistance in peach. We also detected six strong association regions  
279 for precipitation-related EVs, including annual and seasonal precipitation, length of growing  
280 season, aridity, and relative air humidity (Supplementary Fig. S5C and 5D). An extremely strong  
281 association hotspot on Pp02 (4.8~7.2 Mb) was identified, exhibiting enrichments of *R* genes  
282 (Verde et al. 2013), *RLKs* super family genes, NB-ARC domains, and other stress response-  
283 related genes, suggesting a genetic basis for precipitation adaptation.

284 To further elucidate the pattern of adaptation, we detected overlaps between selective  
285 sweeps and GWEAS. A total of 888 genes (~23.3% of GWEAS genes) were shared between  
286 selective sweeps and GWEAS (Supplementary Fig. S6). This revealed that although selective  
287 sweeps are important, adaptations from standing variation or polygenic adaptation are also likely  
288 an important mode of adaptation in peach, which may be related to its shortly spread history after  
289 domestication (Li et al. 2019). These findings suggest that domesticated fruit species, such as  
290 peach, are generating and enhancing adaptation by standing selection on existing multiple sites.  
291 This situation is different from *A. thaliana*, which may have reached its adaptive limits owing to  
292 the constraints imposed by the limited generation of new mutations (Hancock et al. 2011).  
293 Collectively, these results indicate that both selective sweeps and GWEAS are central factors in  
294 the adaptive genetics of domesticated species.

295

### 296 **Adaptation to highly drought regions**

297 The NW group is from northwestern China, which has an extreme climate, characterized by  
298 severe aridity (< 150 mm annual rainfall) (Fig. 3A) and extreme high or low temperatures in the  
299 summer (> 40 °C) or winter (< -30 °C) (Supplementary Table S3). Peach accessions from this  
300 region are frequently challenged by high drought stress. We found that genes overrepresented in  
301 this group included those involved in abscisic acid (ABA) biosynthesis and signal transduction ( $P$   
302 < 0.05) (Supplementary Table S5), which are well known to regulate drought stress responses.  
303 Transcriptome analyses of peach accessions grown under drought stress conditions revealed that  
304 genes involved in the ABA pathway were highly enriched among differentially expressed genes  
305 (DEGs), including *NCED*, *PYR*, *ABA2*, *PP2C*, and *ABRE* genes that showed selective signals in

306 the NW group (Fig. 3B), further suggesting a key role of ABA pathway in peach drought responses.

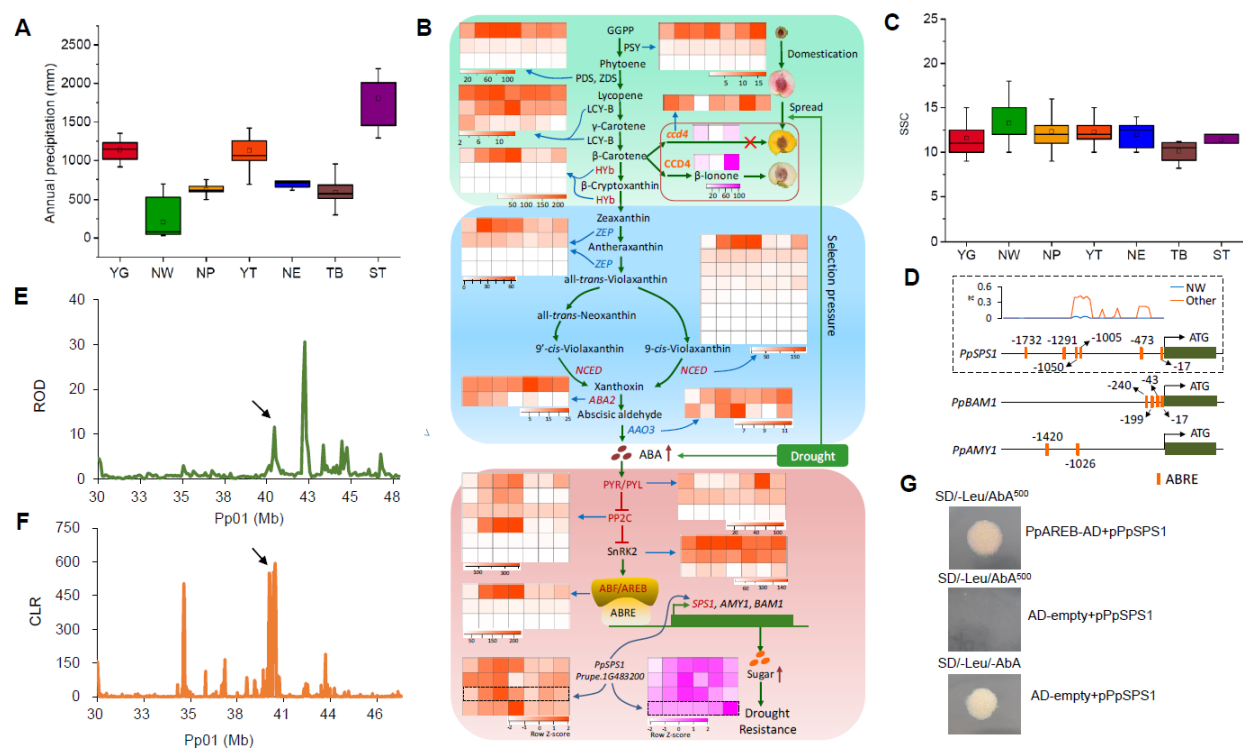

307  
 308 **Fig. 3 Genetic basis of drought resistance and high sugar content in the NW group.** (A) Annual  
 309 precipitation among the seven groups. (B) Relationship between the ABA pathway, drought stress and  
 310 evolution of flesh color. Heat map in orange indicate gene expression levels (FPKM) under drought  
 311 stress (0h, 6h, 12h, 24h, 3d, 6d, 12d). Heat maps in pink indicate gene expression levels (FPKM)  
 312 during peach fruit development (10, 50, and 90 days post bloom date (dpb) for *PpCCD4*; 20, 40, 60,  
 313 80, 100, 120 dpb for *PpSPS1*). Genes under selection in the NW group are highlighted in red. Red  
 314 arrows indicate the increase in levels of ABA and sugars. (C) Soluble solid content (SSC) among the  
 315 seven groups. (D) ABRE *cis*-acting elements in the promoters of *PpSPS1*, *PpBAM1*, and *PpAMY1*.  
 316 Orange boxes indicate ABRE elements in the promoter of each gene. The number around each ABRE  
 317 represents the position from the ATG. The distribution of ABRE elements and nucleotide diversity in  
 318 the promoter of *PpSPS1* in the NW and other groups are shown in a dashed box. (E) Distribution of  
 319 ROD around *PpSPS1* on chromosome 1. Black arrow points to *PpSPS1*. (F) Distribution of CLR values  
 320 around *PpSPS1* on chromosome 1. Black arrow points to *PpSPS1*. (G) Verification of the interaction  
 321 between *PpAREB* (*Prupe.1G434500*) and the promoter of *PpSPS1* (*Prupe.1G483200*) using a yeast  
 322 one-hybrid assay.

323  
 324 Sugars function as the important signaling molecules in response to a range of abiotic and  
 325 biotic stresses in plants (Lastdrager et al. 2014). We found that peach fruits produced by

326 accessions from the NW group, especially accessions from Xinjiang province (Wang et al. 2012),  
327 consistently had higher soluble sugar contents than those from other groups (Fig. 3C). Associated  
328 long-term natural selection pressures contributing to greater accumulation of soluble sugars likely  
329 include aridity, high diurnal temperature variation, and long sunshine duration. Moreover, the  
330 starch and sucrose metabolism pathways were overrepresented in both DEGs under drought  
331 stress treatment (35 genes) and genes under selection in the NW group (12 genes) ( $P < 0.05$ ),  
332 congruent with roles of sugars in drought stress. Furthermore, all the 12 genes in the selective  
333 sweeps were differentially expressed following the drought stress treatment. We conclude that  
334 higher soluble sugar contents in accessions from northwestern China represent an adaptive trait  
335 driven by the local drought environment.

336 Previous studies of apple have demonstrated that drought stress and ABA contributed to  
337 soluble sugar accumulation through the activation of sugar transporter and amylase genes by the  
338 ABA-responsive transcription factor, *AREB2* (Ma et al. 2017). Similarly, both drought stress and  
339 exogenous ABA induce an increase in soluble sugar accumulation in peach fruit (Kobashi et al.  
340 2000; Kobashi et al. 2001). Here we found that two putative gene targets of *AREB2* (Fig. 3B and  
341 3D), *PpAMY1* (*Prupe.1G142400*) and *PpBAM1* (*Prupe.1G053800*), were up-regulated by drought  
342 treatment; however, neither exhibited a significant selection signal. To identify additional target  
343 genes in drought mediated sugar accumulation, we searched for genes harboring the putative  
344 binding domain of *AREB2* among genes under selection in the NW group. This revealed a sucrose  
345 phosphate synthase gene (*PpSPS1*, *Prupe.1G483200*), with six ABA-responsive elements  
346 (ABREs) in the promoter region (Fig. 3D), showing a strong selection signal, with high ROD and  
347 CLR values (Fig. 3E and 3F). *PpSPS1*, which is involved in the biosynthesis of sucrose, the  
348 predominant soluble sugar in mature peach fruit and the key factor conferring sweetness, was  
349 up-regulated by drought treatment (Fig. 3B), suggesting its roles in drought stress response. The  
350 expression of *PpSPS1* increased by ~500-fold during fruit maturity (Fig. 3B), implying its roles in  
351 fruit ripening and sugar accumulation. Using a yeast one-hybrid experiment, we verified the  
352 interactions between *AREB/ABF* and the promoter of *PpSPS1* (Fig. 3G), providing new insight  
353 into ABA-mediated enhanced sugar accumulation under drought stress. The selection on sugar  
354 related genes may mediate adaptation to drought stress in the NW group, accompanied by the  
355 increases in fruit sugar content. In addition, we found that the top of chromosome 5 and the middle  
356 of chromosome 4, which have been reported to harbor major SSC- and sugar content-associated  
357 quantitative trait loci (QTLs) and SSC candidate gene *PpNCED3* (Martínez-García et al. 2013; Li  
358 et al. 2019), also showed strong selection signals in the NW group. Selections on these genes  
359 may underlie the genetic basis of high sugar levels in peach accessions grown in areas with high

360 drought stress. Moreover, such genes represent excellent candidates for high-sugar breeding.

361 Intriguingly, we found that flesh color of peach showed strong geographic pattern, with  
362 ~80% of yellow-fleshed peach landraces originating from northwestern China (NW group). Yellow  
363 flesh of peach mainly depends on the content of carotenoids at maturity, including  $\beta$ -cryptoxanthin  
364 and  $\beta$ -carotene, and carotenoids are believed to be the major precursors for ABA biosynthesis  
365 (Fig. 3B). A previous study has identified three loss-of-function variants involved in a carotenoid  
366 cleavage dioxygenase gene (*PpCCD4*, *Prupe.1G255500*), leading to the abnormal carotenoid  
367 degradation and yellow flesh (Falchi et al. 2013). The disturbed function of *PpCCD4* in yellow-  
368 fleshed peach resulted in the retention of carotenoids, which can provide more precursors for ABA  
369 biosynthesis (Fig. 3B), and may contribute to higher ABA levels and subsequent enhanced  
370 drought tolerance. Moreover, using transcriptional analyses, we found that *PpCCD4* was down-  
371 regulated by drought treatments (Fig. 3B), suggesting its response to drought stress. Furthermore,  
372 the carotenoid biosynthetic pathway was highly overrepresented with genes under selection in  
373 the NW group ( $P < 0.05$ ). Therefore, we conclude that yellow peach flesh has undergone long-  
374 term adaptive selection, driven by drought stress, and that modern yellow-fleshed peach cultivars  
375 may originate from northwestern China.

376 Collectively, we constructed a joint pathway for drought adaptation evolution in peach, driven  
377 by the complicated interactions between carotenoids, ABA, and sugar, of which ABA may be the  
378 central controller and play the key roles.

379

### 380 **Adaptation to high altitudes**

381 Members of the TB group ( $n=45$ ) are from 'the roof of the world', Tibet plateau, which is the highest  
382 plateau on the earth, with an average elevation of 4500 m. This area is inhospitable to many  
383 organisms because of its strong ultraviolet radiation, hypoxia, and severe cold (Supplementary  
384 Table S3). At high altitudes, genome integrity is continuously challenged by intensive solar  
385 ultraviolet radiation (UV-B, 280-315 nm)-induced DNA damage. Peach accessions in the TB group  
386 tolerate these conditions using several adaptation-related phenotypes, such as a dark branch  
387 color, epigeal germination, and red-colored new shoots (Supplementary Fig. S7). We identified  
388 339 genomic regions, harboring 920 genes, showing signals of natural selection in the TB group  
389 (Supplementary Table S4). Of which, we found a significant enrichment of genes involved in  
390 'response to UV-B' category ( $P = 0.0004$ ) (Supplementary Table S5), which is consistent with the  
391 adaptation to high-altitude origin of the TB group. Flavonoids are a group of plant secondary  
392 metabolites, which play important roles in UV-B protection (Li et al. 1993), and we found two  
393 genes in the flavonoid biosynthetic pathway in the 'response to UV-B' category (Fig. 4A): chalcone

394 synthase (*PpCHS2*, *Prupe.4G252100*) and phenylalanine ammonia-lyase (*PpPAL*,  
 395 *Prupe.6G235400*), both of which showed strong selection signals in the TB group, with high  $\mu$  and  
 396 Tajima's *D* values (Fig. 4B and 4C). Chalcone synthase catalyzes the first committed step in  
 397 flavonoid biosynthesis and previous studies showed that functional perturbation of an *A. thaliana*  
 398 homolog, *AtCHS*, resulted in UV-hypersensitive phenotypes, while in a UV-B-tolerant mutant  
 399 *Atchs* was up-regulated (Birza et al. 2001). We found that *PpCHS2* was highly and specifically  
 400 expressed in the phloem of new shoots in the TB group (Fig. 4D), consistent with the red new  
 401 shoot phenotype. By scanning genomic variants in or around *PpCHS2*, we found that a SNP  
 402 (Pp04: 16,896,126, A>T) causing the introduction of a premature termination codon (Fig. 4E)  
 403 showed a high frequency in low altitude accessions (76.3%), but extreme low frequency of  
 404 substitution allele in the TB group (2.0%). Intriguingly, this SNP was located at the key active  
 405 region for protein function, CoA-binding motif (Fig. 4F), leading to an incomplete binding motif that  
 406 may result in the loss of function. Moreover, the premature termination resulted in the loss of one  
 407 conserved catalytic residue which is also crucial for catalytic activity (Ferrer et al. 1999). Therefore,  
 408 this SNP was designated as a candidate causative variant for the red new shoot phenotype  
 409 involved in flavonoid-mediated UV-B adaptation. Collectively, our results suggest that selection  
 410 on *CHS* gene and the regulation of anthocyanins may be one of important mechanisms to confer  
 411 avoiding damage from UV irradiation for peach at high altitudes.

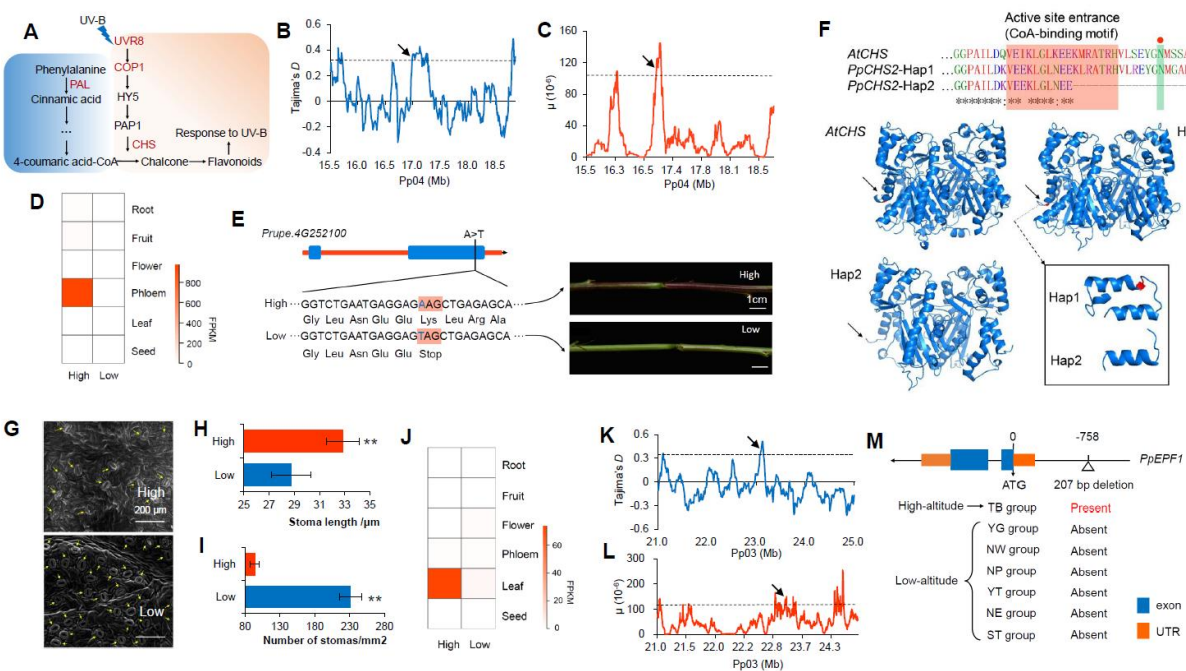

412  
 413 **Fig. 4 Genomic regions and candidate genes related to high-altitude adaptation in Tibet. (A)**  
 414 **Pathway related to plant response to UV-B. Genes under selection are highlighted in red. (B-C)**

415 Distribution of Tajima's  $D$  (**B**) and  $\mu$  values (**C**) in the region around *PpCHS2* (*Prupe.4G252100*) on  
416 chromosome 4 (15.5-19.0 Mb). The dashed horizontal lines indicate a threshold of top 5% for Tajima's  
417  $D$  ( $\geq 0.36$ ) and  $\mu$  test ( $\geq 1.07$ ). Arrows point to *PpCHS2*. (**D**) Heatmap of expression profiles of *PpCHS2*  
418 in different tissues in low- and high-altitude accessions. (**E**) A candidate stop-gained SNP in *PpCHS2*  
419 that is associated with high altitude adaption and new shoot colors in accessions from low- and high-  
420 altitudes. (**F**) Effects of stop-gained SNP on protein structure of CHS. 3D structure of CHS protein was  
421 obtained from Swiss-prot. The red shadow represents the CoA-binding motif. The green shadow  
422 represents one of the conserved enzyme active site. (**G**) Scanning electron microscopy (SEM) of  
423 stomata from the leaves of high- and low-altitude accessions. The magnification is 800x. (**H-I**)  
424 Stomatal length (**H**) and stomatal density (**i**) in high- and low-altitude accessions. \*\* indicates  $P < 0.01$ .  
425 (**J**) Heatmap of expression profiles of *PpEPF1* in different tissues in accessions from low- and high-  
426 altitudes. (**K-L**) Distribution of Tajima's  $D$  (**K**) and  $\mu$  values (**L**) in a region around *PpEPF1*  
427 (*Prupe.3G235800*) on chromosome 3 (21.0-25.0 Mb). The dashed horizontal lines indicate a threshold  
428 of top 5% for Tajima's  $D$  ( $\geq 0.36$ ) and  $\mu$  test ( $\geq 1.07$ ). Arrows point to *PpEPF1*. (**M**) Structure of *PpEPF1*  
429 and the position of the 207-bp deletion. The presence and absence of the 207-bp deletion in the seven  
430 groups are given.

431  
432 We observed that, compared with low-altitude accessions, those from high-altitudes had  
433 a lower density of stomata and larger stomata size (Fig. 4G-4I). This may represent an adaptive  
434 evolution to hypoxia at high altitudes. Interestingly, we found that the biological category 'stomatal  
435 complex patterning' was significantly enriched in the gene set under selection ( $P = 0.008$ ). By  
436 transcriptional analyses of these genes, we found one of them, *Prupe.3G235800*, was highly and  
437 specifically expressed in leaves, showing an altitudinal pattern with higher expression levels in  
438 the TB group than in the low-altitude group (Fig. 4J). Notably, *Prupe.3G235800*, which encodes  
439 the epidermal patterning factor 1 (*PpEPF1*) involved in stomatal development (Hara et al. 2009),  
440 showed strong selection signals, based on the high Tajima's  $D$  and  $\mu$  values (Fig. 4K and 4L).  
441 Previous studies have shown that the mutation of a homolog of *PpEPF1* in *A. thaliana* results in  
442 increased stomatal density (Hara et al. 2009). By scanning the variants in *PpEPF1*, we found that  
443 SNPs with functional significance were absent. Through further scanning variants at the upstream  
444 or downstream of *PpEPF1*, we identified a TB group specific 207-bp deletion in the promoter  
445 region (-758 bp from the start codon) of *PpEPF1* (Fig. 4M), suggesting that the adaptive evolution  
446 controlled by *PpEPF1* may be mediated by regulation of its expression. Furthermore, over-  
447 expression of *PpEPF1* in *A. thaliana* resulted in a decrease in stomatal density (Supplementary  
448 Fig. S8). These findings suggest that selection on *PpEPF1* may be closely related to adaptation  
449 to hypoxia in high-altitudes through the regulation of stomatal density.

450  
451  
452  
453  
454  
455  
456  
457  
458  
459  
460

## A major *SVP* locus involved in adaptive evolution of bloom date

Bloom date (BD) is crucial for local adaptation in peach, and is controlled by multiple genes (Fan et al. 2010). To explore the genetic basis of adaptation of BD, we performed GWAS of BD using 174 accessions that were phenotyped. This revealed 399 associated SNPs and 12 association peaks (Fig. 5A), of which six overlapped with previously reported QTLs (Fan et al. 2010). Next, we identified candidates involved in local adaptation by detecting SNPs showing associations with EVs using a latent factor mixed-effect model (LFMM), resulting in a final set of 23 association peaks (Fig. 5A). By overlapping BD GWAS and LFMM analyses, we found four regions on chromosomes 3, 5, 6, and 8 that may underlie the local adaptation of BD during spread of peach to different climates (Fig. 5A).

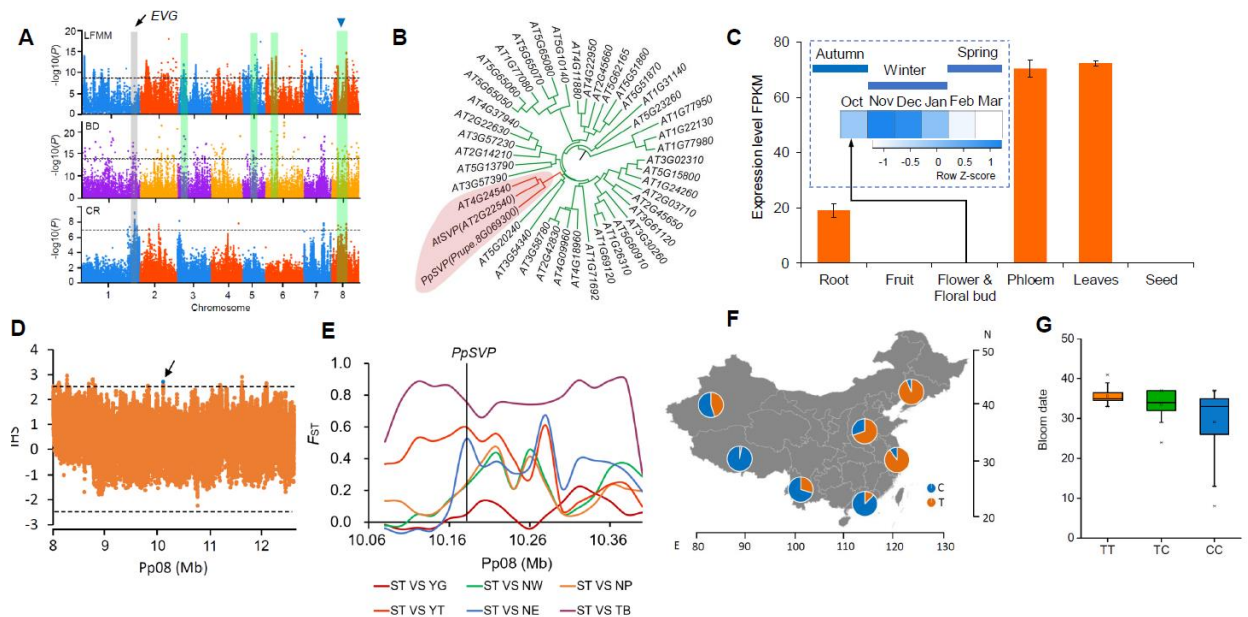

461  
462  
463  
464  
465  
466  
467  
468  
469  
470  
471  
472

**Fig. 5 A major *PpSVP* locus involved in local adaptation of bloom date in peach.** (A) Manhattan plots of SNPs associated with EVs (LFMM), bloom date (BD), and chilling requirement (CR). Dashed lines represent the significance thresholds for the tests. The overlapped regions between GWAS for BD and LFMM are highlighted using green shaded rectangles. The major QTL for CR and BD overlapping with local selection signals on chromosome 8 surrounding *PpSVP* is indicated by a blue triangle. The *EVG* locus is highlighted using a gray shaded rectangle. (B) Neighbor-joining tree of *PpSVP* and MIKC-type MADS family genes. The clade containing *PpSVP* is highlighted in red. (C) Temporal and spatial expression patterns of *PpSVP*. Error bars represent standard deviation of three biological replicates. (D) Patterns of normalized iHS scores across the ~4 Mb genomic region around *PpSVP*. The dashed horizontal lines represent the threshold of positive selection signal ( $|iHS| > 2.5$ ). The blue dot indicates the SNP (Pp08: 10,173,576) that showed high iHS score in *PpSVP*. (E)  $F_{ST}$



473 around *PpSVP* among different groups. The associated SNP in *PpSVP* is indicated using vertical black  
474 line. (F) Allelic frequencies of the associated SNP (Pp08: 10,173,576) in *PpSVP* across seven groups.  
475 (G) Relationship between genotypes of associated SNP (Pp08: 10,173,576) and bloom date.

476

477 Chilling requirement (CR) is another important adaptive trait and is significantly correlated  
478 with BD. We re-performed the GWAS for CR based on our previous study (Li et al. 2019) using  
479 174 landrace accessions and identified six association peaks, of which three (chromosome 1, 7,  
480 and 8) were shared with BD (Fig. 5A), including the major QTL for CR harboring the *EVG* locus  
481 conferring dormancy mutation in peach (Li et al. 2009). After overlapping GWAS of CR and BD  
482 with the LFMM analysis, we found a strong overlap spanning ~4-Mb on chromosome 8, which  
483 may be important for local adaptation of BD in peach (Fig. 5A). Interestingly, the major QTL for  
484 CR and BD on chromosome 1 showed no local adaptation signal in the LFMM analysis (Fig. 5A),  
485 suggesting that climates may drive the evolution of BD and CR by shaping QTLs with small effects.

486 The 4-Mb region encompasses 275 genes, including a putative ortholog of *A. thaliana*  
487 *SHORT VEGETATIVE PHASE* (*PpSVP*, *Prupe.8G069300*). *SVP* is involved in controlling  
488 flowering time and has previously been implicated in regulating dormancy in *Prunus* (Li et al. 2009;  
489 Sasaki et al. 2011; Zhang et al. 2012). Phylogenetic analysis confirmed that *PpSVP* belongs to a  
490 MADS-box family and is closely related to the *AGL22* subfamily (Fig. 5B). *PpSVP* showed strong  
491 tissue-specific expression, with high expression only in vegetative organs. Moreover, expression  
492 of *PpSVP* was up-regulated during dormancy induction and down-regulated by winter chill (0-  
493 7.2 °C) and by forcing temperature (heat) in floral buds in spring (Fig. 5C), suggesting its potential  
494 role in regulating BD and CR. Moreover, through calculating the standardized integrated  
495 haplotype score (iHS) for SNPs located in this overlap region, we found a strong positive selection  
496 signal around the *PpSVP* locus (Fig. 5D). Additionally, an exceptionally high  $F_{ST}$  value was  
497 identified in this region, especially between the ST and NE groups and between the ST and YT  
498 groups (Fig. 5E) that harbor distinct bloom date. The *PpSVP* locus thus represents a strong  
499 candidate gene for local adaptation of BD and CR. We propose that spatially varying selection  
500 has driven latitudinal differentiation at this locus. Positive selection signals, revealed by a CLR  
501 test, were also detected in the NE and ST groups (Fig. 5F). Overall, all these results provide  
502 compelling evidence of local selection on the *PpSVP* locus during adaptive evolution to different  
503 climates after domestication.

504 To identify the causal variants underlying adaptation of BD, we screened for SNPs with  
505 high  $F_{ST}$  between the NE (late bloom) and ST (early bloom) groups at the *PpSVP* locus. No SNP  
506 with high differentiation was identified that caused an amino acid change. However, a SNP located

507 at 5'-untranslated regions (5'-UTR) with high  $F_{ST}$  value ( $F_{ST}=0.9$ ) was identified, suggesting that  
508 the BD and CR may adapt to different climates through shaping the expression of the controlled  
509 gene. Allele frequencies of this SNP showed strong geographical pattern and the early bloom  
510 alleles (CC) mainly occurred in low altitude regions (ST and YG groups) and wild group (TB group)  
511 (Fig. 5G and 5H), consistent with phenotype. This also provides insights into two distinct  
512 evolutionary routes of BD and CR to low and high chill regions. Moreover, overexpression of the  
513 low-altitude favored genotype of *PpSVP* (CC) in *A. thaliana* resulted in plants with strong  
514 vegetative growth and delayed flowering time (Li et al. 2019).

515

### 516 **Genomic locus associated with response to climate change**

517 Adaptation to accelerating rates of climate change is increasingly important for species survival.  
518 The advance in bloom date (ABD), as a consequence of global warming over recent decades,  
519 has been observed in many temperate species, including peach (Menzel et al. 2006; Li et al.  
520 2016). However, the genetic mechanism underlying ABD have not been characterized. We  
521 performed a long-term observation of BD with 89 peach accessions spanning three decades, from  
522 the 1980s to 2010s (Supplementary Fig. S9A). We observed a significant ABD ( $P < 0.001$ ), based  
523 on an additive main effects and multiplicative interaction (AMMI) analysis (Annicchiarico, 1997),  
524 and the main driver was found to be a temperature rise in the spring (explained 61.3% variation,  
525  $P < 0.001$ ) (Fig. 6A). Using a linear regression analysis, we quantified ABD and found that BD  
526 has advanced by approximately 10 days on average over last 30 years (Fig. 6B).

527 Next, we performed GWAS for ABD to identify genetic loci associated with responses to  
528 global warming (Supplementary Fig. S9B). This revealed a strong association peak on  
529 chromosome 8 ( $P < 7.28 \times 10^{-8}$ ) (Fig. 6C) in an area harboring 14 candidate genes around peak  
530 association. This association was also located at overlap among GWAS signals of CR, BD and  
531 LFMM analysis. The most significant SNP was located in a region upstream of *Prupe.8G062200*,  
532 with genotype of TT showing sensitive to global warming and CC insensitive (Fig. 6D and 6E).  
533 *Prupe.8G062200* encodes a putative night light-inducible and clock-regulated 1 (LNK1) protein,  
534 and showed high expression levels at blooming. A homolog of this gene in *A. thaliana* is involved  
535 in regulation of the circadian clock, which regulates *COL1* genes at warm temperatures, and thus  
536 a potential regulator of flowering time (Mikkelsen and Thomashow 2009; Rugnone et al. 2013). A  
537 simulation experiment showed that *PpLNK1* was up-regulated by rising temperatures during heat  
538 accumulation, suggesting that *PpLNK1* may be up-regulated by temperature rise in spring (Fig.  
539 6F). In addition, expression of *PpLNK1* in peach accessions that are sensitive to global warming  
540 was significantly higher than in those that are insensitive (Fig. 6G). Notably, over-expression of

541 *PpLNK1* in model plant, *A. thaliana*, led to the early flowering (Fig. 6H). Moreover, several cis-  
 542 elements associated with temperature and light responsiveness was identified (Supplementary  
 543 Table S10). Therefore, we conclude that *PpLNK1* may play important roles in regulating annual  
 544 circadian clock of flowering time as influenced by rising temperature in peach. *PpLNK1* is thus a  
 545 plausible candidate gene for responses to global warming, but further work will be necessary to  
 546 provide more direct evidence of its roles. Collectively, our comprehensive analyses detected  
 547 genomic loci associated with responses to global warming, which can improve our understanding  
 548 of the genetic architecture of plant adaptation to global climate change.

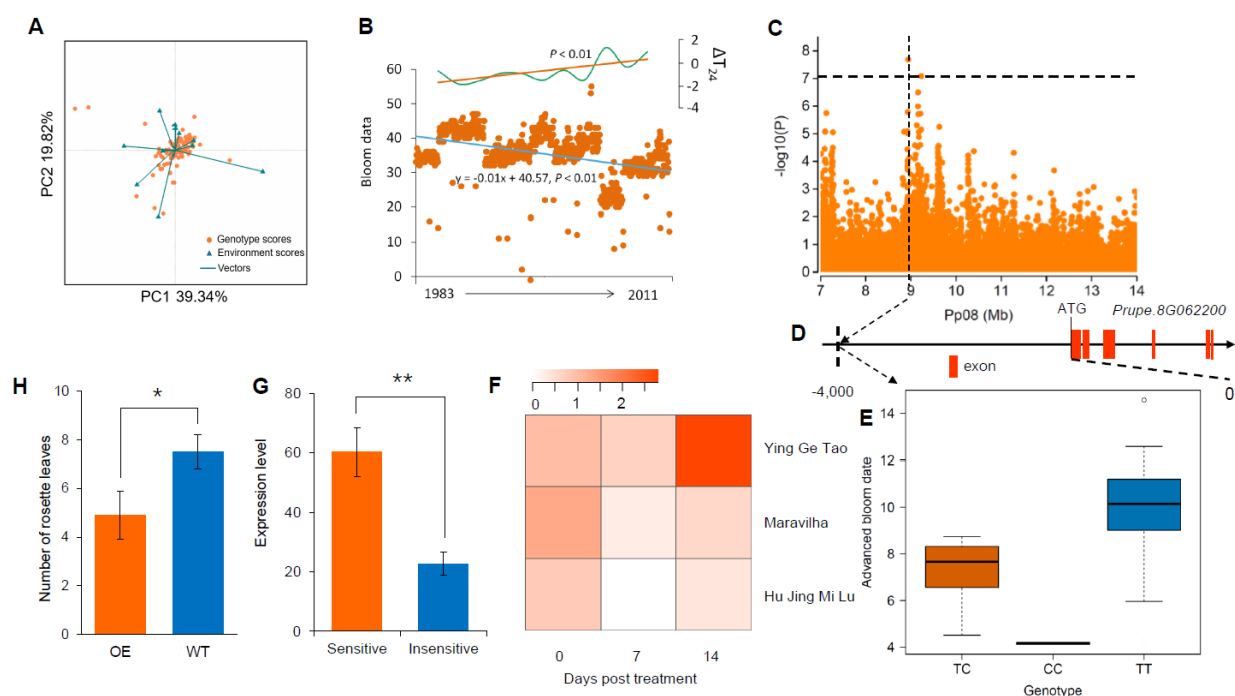

549  
 550 **Fig. 6 Genotype-environment interaction analysis and genome-wide association study of**  
 551 **advance in bloom date.** (A) Genotype-environment interaction analysis of bloom date from 1983 to  
 552 2011 using the AMMI analysis. (B) Scatter plots of relative bloom date of 89 peach accessions from  
 553 1983 to 2011 and temperature change in the spring. The blue and orange lines represent the trend of  
 554 bloom date changes and temperature changes in the spring, respectively, based on the linear  
 555 regression analyses.  $\Delta T_{24}$  indicates anomalies in the mean temperature from February to April  
 556 compared to those from 1983-2011. (C) Regional Manhattan plot of GWAS for ABD on chromosome  
 557 8 of the 7.0-14.0 Mb region. The gray dashed line indicates significance threshold ( $P < 7.28 \times 10^{-8}$  or  
 558  $-\log_{10}(P) > 7.08$ ) using a Bonferroni test (0.05). (D) Most significant SNP associated with ABD and its  
 559 location relative to gene *PpLNK1* (*Prupe.8G062200*). (E) Association between genotypes of the most  
 560 significant SNP and ABD. (F) Changes in *PpLNK1* expression in three cultivars in a climate warming  
 561 simulation experiment. dpt, days post treatment. (G) Comparison of *PpLNK1* expression between

562 accessions sensitive and insensitive to global warming at blooming. \*\* represents  $P < 0.01$ . (H)  
563 Comparison of BD between wild type (WT) and *PpLNK1* over-expression (OE) *A. thaliana* lines. \*  
564 indicates  $P < 0.05$ .

565 Long-term observation of BD enabled multi-year GWAS. We identified a total of 713 SNPs  
566 associated with BD ( $P < 7.28 \times 10^{-8}$ ), including 483 temporary associations that were identified  
567 only in one year, 214 associations in at least two years, and 16 stable associations in more than  
568 five years, of which several overlapped with previous reported QTLs (Fan et al. 2010)  
569 (Supplementary Table S11). Among stable associations, a strong association peak within a small  
570 intergenic region (Pp06: 15,327,714~15,354,080) on chromosome 6 was identified in eight years  
571 of GWAS, which can be further developed for marker-assisted selection.

572

## 573 Conclusions

574 Plant genomes have been shaped by natural selection during the local adaptation to diverse  
575 environmental conditions. Peach provides an excellent model to investigate the genetic basis and  
576 mode of adaptation to climate change, thanks to its relatively small genome size (~227.4Mb) and  
577 extensive climatic variation across its native range. We generated a large variation map for peach  
578 through sequencing of a climate-extensive panel of 263 peach landraces and wild relatives.  
579 Notably, we first detected the genetic basis of adaptation to high altitudes for fruit species, *P. mira*  
580 (TB group), and we found that genes involved in the biosynthesis of flavonoids (*PpCHS2*) and  
581 stomatal development (*PpEPF1*) may play important roles in overcoming strong UV-B radiation  
582 and hypoxia, respectively, on the Tibet Plateau. We discovered that high sugar content and yellow  
583 flesh of peach in drought regions were drought-induced adaptive evolution mediated by  
584 interactions between the abscisic acid pathway, *PpSPS1* and carotenoids. More than nine  
585 thousand genomic loci, associated with 51 specific climate variables, were identified. These  
586 included several hotspots associated with temperature and precipitation, as well as a SNP  
587 associated with cold hardiness. Integrative analyses of selective sweeps and GWEAS suggest  
588 that peach adaptation was generated and enhanced by standing selection on multi sites. Genomic  
589 loci underlying the local adaption of BD and CR were found to be two evolutionary adaptations to  
590 low and high latitude regions. In addition, through data collected over a 30-year period, we  
591 identified a candidate genetic locus associated with responses to global warming in plant species.

592 This study provides new insights into peach adaptation to its habits and how climate has  
593 shaped the genome of a perennial tree plant through natural selection. These results also provide  
594 a new resource for studies of peach evolutionary biology and breeding, especially with regard to  
595 enhancing stress-resistance.

## 596 **Methods**

### 597 **Plant materials and sequencing**

598 A total of 263 peach accessions were sampled from the NPGRC (National Peach Germplasm  
599 Repository of China), except the 45 *P. mira* accessions, which were sampled from the Tibet  
600 plateau. These accessions, collected from almost all the distribution regions of peach landraces  
601 and wild relatives, including seven major ecotypes. These accessions included 45 of *P. mira*  
602 Koehne, 4 of *P. davidiana* (Carr.) Franch., 2 of *P. kansuensis* Rehd., a single *P. potaninii* Batal.,  
603 205 of *P. persica* L., and 6 of *P. ferganensis* Kost. et Riab (Supplemental Table 1). Of these, *P.*  
604 *persica* L. and *P. ferganensis* Kost. et Riab accessions belong to landraces, while the others are  
605 wild relatives. Total genomic DNA was extracted from young leaves using the  
606 cetyltriethylammonium bromide (CTAB) method (Murray and Thompson 1980). At least 4 µg of  
607 genomic DNA from each accession was used to construct pair-end sequencing libraries with  
608 insert sizes of approximately 300-bp or 500-bp following the manufacturer's instructions (Illumina  
609 Inc.) (Supplemental Table 1). A total of >1 Gb of sequence data was generated for each accession  
610 from 49-bp, 90-bp, or 125-bp paired-end reads, using the Illumina GA or HiSeq 2500 platform  
611 (Illumina, San Diego, USA) (Supplemental Table S1).

612

### 613 **Read mapping and variation calling**

614 Pair-end reads from each accession were mapped to the peach Lovell genome (release v2.0)  
615 using BWA (Li and Durbin 2009) (Version: 0.7.12) with the following parameters: `bwa mem -t 4 -`  
616 `M -R`. Read alignments were converted into the BAM format, sorted according mapping  
617 coordinates, and PCR duplicates removed using the Picard package  
618 (<http://broadinstitute.github.io/picard/>; Version: 1.136) with default parameters. The coverage and  
619 depth of sequence alignments were computed using the Genome Analysis Toolkit (GATK, version:  
620 3.4-46; see URLs) DepthOfCoverage program (McKenna et al. 2010). The coverage and depth  
621 of each accession are detailed in Supplemental Table S1.

622 To accurately identify SNPs, the low-quality alignments (a mapping quality score <20) were  
623 filtered using SAMtools (Li et al. 2009). SNP detection was performed using GATK  
624 HaplotypeCaller, which identifies SNPs by local *de novo* assembly of haplotypes in an active  
625 region (Depristo et al. 2011). The detailed processes were as follows: (1) After filtering the low-  
626 quality alignments, the reads around the INDELS were realigned through two steps, including  
627 identifying regions where realignment was needed using the GATK RealignerTargetCreator  
628 package, and realigning the regions found in the first step GATK IndelRealigner package. Next,

629 a realigned BAM file for each accession, which was used for SNP detection, was generated using  
630 GATK PrintReads packages. (2) SNPs were detected at a population level using the realigned  
631 BAM file with GATK HaplotypeCaller. To reduce the number of false positives, a high SNP  
632 confidence score was set with the following parameters: -stand\_call\_conf 30 -stand\_emit\_conf  
633 40. (3) To ensure the quality of variant calling, a hard filter was applied for the raw SNPs with  
634 SNP quality > 40 and the number of supporting reads > 2, using GTAK VariantFiltration, with the  
635 following parameters: QUAL < 40, QD < 2.0, FS > 60.0, MQ < 40.0, MQRankSum < -12.5,  
636 ReadPosRankSum < -8.0, -cluster 3, -window 10.

637 The accuracy of SNPs was assessed using a Sequenom MassARRAY platform (Sequenom,  
638 San Diego, USA), following the manufacturer's protocol. A total of 18 randomly selected SNPs  
639 was investigated in 130 accessions. The list of accessions is provided in Supplemental Table S2.

640 INDEL calling was performed using the same pipeline as the SNP calling since the GATK is  
641 capable of calling SNPs and INDELS simultaneously. To reduce the number of false positives, we  
642 also applied a harder filter for raw INDELS using GTAK VariantFiltration with the following  
643 parameters: QD < 2.0, FS > 200.0, ReadPosRankSum < -20.0. Insertions and deletions ≤6 bp  
644 were defined as the small INDELS.

645 SV calling was performed using the SpeedSeq (Chiang et al. 2015), DELLY (Tobias et al.  
646 2012), and manta (Chen et al. 2016) programs. For SpeedSeq calling, paired-end reads were  
647 mapped to the reference genome using the 'align' module in SpeedSeq and the following  
648 parameters: speedseq align -R -t 4. Three BAM files were generated, including a full, duplicate-  
649 marked, sorted BAM, a BAM file containing split reads, and a BAM file containing discordant read-  
650 pairs. SVs were identified using the 'sv' module in SpeedSeq, using the following settings:  
651 speedseq sv -o -x -t 25 -R -B -D -S -g -P. For DELLY calling, mapped pair-end reads in BAM  
652 format, generated by BWA-MEM (Li and Durbin 2009) after sorting and marking PCR duplicates,  
653 were used as input files. SVs were identified using the call module in DELLY with default  
654 parameters. SV files in VCF format for all of 263 samples were merged into a population level  
655 VCF file using BCFtools (Li et al. 2009). For SV calling with manta, the same BAM files with  
656 DELLY were used to detect SVs, with default parameters. SV files for 263 accessions were then  
657 merged using SURIVAR (Jeffares et al 2017) and genotyped using SVtyper (Chiang et al. 2015)  
658 with default parameters. Finally, SVs identified by at least two callers were designated as the final  
659 set of SVs.

660

## 661 **SNP annotation**

662 SNP annotation was performed based on genomic locations and predicted coding effects,

663 according to the peach genome annotation (release annotation v2.1, see URLs), using the snpEff  
664 (Cingolani et al. 2012) (Version: 4.1g). The final SNPs were categorized in exonic regions, intronic  
665 regions, splicing sites, 5' UTRs and 3' UTRs, upstream and downstream regions, and intergenic  
666 regions, based on the peach genome annotation. SNPs in coding sequence were further grouped  
667 into synonymous SNPs (no amino acid changes) and nonsynonymous SNPs (amino acid  
668 changes). SNP effects were further divided into four types according to their impacts on gene  
669 function, including HIGH, MODERATE, LOW, and MODIFIER.

670

### 671 **Population genetics analysis**

672 To build a phylogenetic tree, we selected a subset of 2,468,307 SNPs with minor allele frequency  
673 (MAF) >0.05 in all 263 accessions from the final SNP data set (4,611,842). A neighbor-joining  
674 tree was constructed using PHYLIP (Felsenstein 1989) (Version:3.696) on the basis of the distance  
675 matrix with 1,000 bootstrap replicates. The software FigTree  
676 (<http://tree.bio.ed.ac.uk/software/figtree/>; version: 1.4.2) was used to visualize the neighbor-  
677 joining tree. The principal component analysis (PCA) was performed based on the same SNPs  
678 data set (2,468,307 SNPs with MAF > 0.05) using the smartpca program in the EIGENSTR<sup>70</sup>  
679 software (Version: 6.0.1) with default settings (Price et al. 2006). The first three eigenvectors were  
680 used to plot the data in two and three dimensions. The population structure was also investigated  
681 using the same SNP data set (2,468,307 SNPs with MAF>0.05) with the FRAPPE (Version: 1.1)  
682 software (Tang et al. 2005), which is based on a maximum likelihood method. We ran 10,000  
683 iterations, and the numbers of clusters ( $K$ ) were set from 2 to 8.

684

### 685 **Identification of select sweeps**

686 To detect signals of selective sweeps, we selected three distinct genome-wide selection metrics  
687 for each group (excluding the TB group), including the reduction of nucleotide diversity ( $\pi$ ),  
688 Tajima's  $D$ , and genetic differentiation ( $F_{ST}$ ). We calculated these three selection metrics based  
689 on all SNPs (4,611,842) using VCFtools (Danecek et al. 2011) (Version: 0.1.13), with a 10-kb  
690 window and a step size of 1 kb. We defined the empirical top 5% of windows or regions as  
691 candidate selective outliers for each selection scan metric. The adjacent selective outliers were  
692 merged. For each population, selection outliers detected in at least two of the selection scan  
693 metrics were designated as the candidate selection regions (CSRs). The TB group consisted of  
694 wild relatives (*P. mira*) and three other methods were used to detect selective sweeps: Tajima's  
695  $D$ , RAiSD (Alachiotis et al. 2018), and CLR (Pavlidis et al. 2013). Similarly, the top 5% of windows  
696 or regions identified in at least two metrics were designated as candidate selective sweeps.

## 697 **Collection of climate variables**

698 A total of 51 environmental variables were selected as being essential for peach growth and  
699 survival (Supplemental Table S6), representing extremes and seasonality of temperature and  
700 precipitation, altitude, latitude, relative air humidity, water vapor pressure, growing season lengths,  
701 and aridity. Of these, 39 datasets of climate variables were downloaded from WorldClim  
702 (<http://www.worldclim.org>; version: 1.4), with a resolution of 2.5 minutes, and climate variables for  
703 each accession were extracted using DIVA-GIS (<http://www.diva-gis.org>; version: 7.5)  
704 (Supplemental Table S6). Six climate variables were downloaded from CDMC  
705 (<http://data.cma.cn/en/?r=site/index>) and climate variables for each accession were extracted  
706 using ArcGIS (<http://www.arcgis.com>; version: 10.3) (Supplemental Table S6). Four climate  
707 variables were downloaded from the FAO (<http://www.fao.org/geonetwork/srv/en/main.home>),  
708 with a resolution of 5 minutes or 10 minutes and climate variables for each accession were  
709 extracted using ArcGIS (Supplemental Table S7). Altitude and latitude for each accession were  
710 recorded using a GPS (Magellangps triton 300E; <http://www.magellangps.com>) when the  
711 accessions were collected.

712

## 713 **Genome-wide environmental association study (GWEAS)**

714 GWEAS was performed for 51 climate variables using 4,611,842 high-quality SNPs. The  
715 association analyses were performed using the mixed linear model (MLM) with Efficient Mixed-  
716 Model Association eXpedited (EMMAX) software (Zhou and Stephens 2012). To minimize the  
717 number of false positives and increase statistical power, population structure was corrected using  
718 a kinship matrix, which was estimated with EMMAX emmax-kin program (Zhou and Stephens  
719 2012). The genome-wide significance thresholds of the GWEAS were determined using the  
720 Bonferroni test. Based on a nominal level of 0.05, the threshold was set as  $0.05/\text{total SNPs}$   
721 ( $\log_{10}(P) = -7.13$ ).

722

## 723 **Functional enrichment and pathway analysis**

724 To test whether candidate genes were overrepresented among lists from known biological  
725 processes, gene families and pathways, a functional enrichment and pathway analysis was  
726 performed based on Fisher exact tests ( $P < 0.05$ ), using the Database for Annotation,  
727 Visualization and Integrated Discovery (DAVID) (Huang et al. 2009) (Version: 6.7). To obtain the  
728 comprehensive functional annotations, a list of annotation categories was selected, including GO  
729 terms and KEGG pathway. The annotation analysis was performed for genes that were in  
730 selective sweeps and GWEAS associations.



## 731 **Phenotyping and genome-wide association study (GWAS)**

732 The first bloom date (BD) was measured at the National Peach Germplasm Repository of China  
733 (NPGRC) (N34.71°, E113.70°, A.S.L. 74 m), located in Zhengzhou, Henan Province, China. The  
734 first bloom date data used span February 25 to April 25 from 1983 to 2011 as this period captured  
735 the majority of diversity of BD. A total of 89 accessions, with each represented by two replicates,  
736 were used to investigate BD (Supplemental Fig. S9A). The first bloom date was defined as the  
737 day when approximately 5% of the flowers have completely opened. The advance in bloom date  
738 (ABD) for each accession was estimated using a linear regression analysis, based on the BD  
739 from 1983 to 2011. The ABD information for each accession is detailed in Supplemental Fig. S9B.

740 To identify genetic loci associated with ABD, GWAS was performed for ABD based a set of  
741 873,895 SNPs, identified after removing SNPs with low-frequency ( $MAF < 0.05$ ) and a high  
742 missing rate (missing rate  $> 0.2$ ) using the EMMAX program (Zhou and Stephens 2012). To  
743 minimize the number of false positives and to increase the statistical power, population structure  
744 was corrected using a kinship matrix, which was calculated with EMMAX emmax-kin program  
745 (Zhou and Stephens 2012). The genome-wide significance threshold of the GWAS was  
746 determined using the Bonferroni test. Based on a nominal level of 0.05, the threshold was set as  
747  $0.05/\text{total SNPs}$  ( $\log_{10}(P) = -7.08$ ). GWAS was also performed for yearly BD data from 1983 to  
748 2011 based on the same SNP data set, using the same method as above.

749 For CR, phenotyping analyses were performed in 2011 and 2012 as in Fan et al (2010). A 0-  
750 7.2°C model was chosen to evaluate CR and the number of hours in this range (chilling hours;  
751 CHs) was counted, starting when the daily average air temperature dropped to below 7.2°C.  
752 Starting at 50 CHs, the branches of each accession were cut every 50 CHs until 1,300 CHs. For  
753 each accession, two clones were sampled, and three branches longer than 40 cm with floral buds  
754 were taken from each clone. Branch cuttings were placed in water in a greenhouse at 25°C and  
755 a 16 h/8 h photoperiod to force floral bud break. The frequency of floral bud break was evaluated  
756 after two weeks. The CR of an accession was defined as being sufficient at a specific sampling  
757 time if 50% of floral buds on the branch cuttings opened. GWAS for CR was also performed using  
758 MLM in EMMAX.

759 Cold hardiness was evaluated using a conductance-based semi-lethal temperature method  
760 in December-January of 2013-2014 on 143 accessions. Six annual branches longer than 20 cm  
761 were sampled for each accession. A total of six cold treatments were used: -10, -15, -20, -25, -  
762 30, and -35°C. Branch cuttings were incubated in freezer with the six treatments for 24 h. After  
763 cold treatments, the cuttings were placed at 0°C for 8 h. Branch cuttings were then cut into 2 mm  
764 segments. A total of 2 g of segments was used to measure the conductance, with three biological

765 replicates. The initial conductance (C1) was measured after a 12 h steep in 10 ml water. The final  
766 conductance (C2) was measured after boiling the samples for 20 min and leaving them to cool to  
767 room temperature for a subsequent 2 h period. The relative conductance (RC) was calculated  
768 using following formula:

$$769 \quad RC=(C1/C2) \times 100$$

770 Finally, the semi-lethal temperature (LT50) was calculated using a logistic function based on  
771 RC.

772

### 773 **Yeast one-hybrid assay**

774 Yeast one-hybridization assay was performed using the Matchmaker® Gold Yeast One-Hybrid  
775 System (Clontech, Palo Alto, CA, USA). The promoter sequence (upstream 2kb from the start  
776 codon) of the sucrose phosphate synthase, *PpSPS1* (*Prupe.1G483200*), was cloned into the  
777 pAbAi vector. Similarly, the full-length of ABA-responsive element binding 1, *PpAREB1*  
778 (*Prupe.1G434500*), was subcloned into the pGADT7 AD vector. The auto-activation and TF–  
779 protein interaction analyses were conducted according to manufacturer's protocol.

780

### 781 **Scanning electron microscopy (SEM)**

782 Stomata were examined by SEM in young leaves from three accessions from the TB group and  
783 three accessions from the NP group, representing high-altitude and low-altitude accession,  
784 respectively. Three replicates were sampled from each accession. Samples were fixed in 2.5%  
785 glutaraldehyde (pH = 7.4) for 24 h at 4°C. Subsequently, fixed samples were dehydrated using an  
786 ethanol series (30% ethanol, 20 min; 50% ethanol, 20 min; 70% ethanol, 20 min; 100% ethanol,  
787 30 min (twice)). The dehydrated samples were then dried in a critical-point drying apparatus  
788 (Quorum K850; England). Dried samples were mounted on stubs and sputter-coated with gold  
789 (FEI; America) and observed under a scanning electron microscopy (SEM) (FEI Quanta 250;  
790 America).

791

### 792 **RNA-Seq analysis**

793 For drought stress treatment, four-year-old potted peach seedlings from peach cultivar “Dong Xue  
794 Mi Tao” were used. Fruit flesh were taken at six drought stress treatment time points, including 6  
795 hours, 12 hours, 24 hours, 3 days, 6 days, and 12 days. For expression profiles in different tissues,  
796 roots, leaves, fruit, flowers, phloem, and seeds were sampled from “Aba Guang He Tao” (high-  
797 altitude) and “B-4” (low-altitude). For the expression of *PpCCD4*, fruit fleshes were sampled from  
798 “Zao Huang Pan Tao” (yellow-fleshed) and “Zhong Tao Hong Yu” (white-fleshed) at 10, 50, and

799 90 days post bloom date (dpb). For the expression of *PpSPS1*, fruit fleshs were sampled from  
800 “Chinese cling” at 20, 40, 60, 80, 100, 120 dpb. Three biological replicates were collected for each  
801 sample. The tissues were immediately frozen in liquid nitrogen and then ground to fine powder.  
802 Total RNA was extracted using a quick extraction kit (Aidlab, Beijing, China). First and second  
803 strand complementary DNA (cDNA) was synthesized using a cDNA Synthesis System kit  
804 (TOYOBO, Osaka, Japan), following the manufacturer’s protocol. Double-strand cDNAs were  
805 then purified and adapters were ligated to the short fragments. The constructed RNA-Seq libraries  
806 were sequenced using the Illumina HiSeq 2000 platform (Illumina, San Diego, USA) in paired-  
807 end 150-bp mode. Low-quality reads were filtered from the raw reads using Trimmomatic (Bolger  
808 et al. 2014). Data analysis followed the protocol proposed by Perteau et al (2016). Cleaned reads  
809 were mapped to the peach reference genome using Hisat2 (Version 2.0.5) (Kim et al. 2015) with  
810 default parameters. Transcript abundances were calculated and transcript assembly was  
811 performed using Stringtie (Perteau et al. 2015). DEG analysis was carried out using the R package  
812 ballgown (Frazee et al. 2015).

813

#### 814 **Over-expression of candidate genes in *A. thaliana***

815 The full-length open reading frames of three peach genes, *PpEPF1* (*Prupe.3G235800*), *PpSVP*  
816 (*Prupe.8G069300*), and *PpLNK1* (*Prupe.8G062200*), were amplified by PCR using cDNAs  
817 derived from young leaves of “Aba Guang He Tao”, ‘Nanshan Tian Tao’ (CR=200h), and  
818 “Nanshan Tian Tao”, respectively. The PCR products were cloned into the pBI121 vector driven  
819 by the cauliflower mosaic virus (CaMV) 35S promoter at Sangon Biotech (Sangon, Shanghai,  
820 China). The resulting constructs were then transformed into *A. thaliana* Columbia type using  
821 *Agrobacterium tumefaciens* GV3101 and positive transformants selected with kanamycin. Ten  
822 transgenic lines for each gene were used to evaluate the flowering time. The stomata size and  
823 density were observed under a light microscope (Olympus BX51, Tokyo, Japan) with a 400 ×  
824 objective lens.

825

#### 826 **RNA extraction and expression analysis using qRT-PCR**

827 For *PpSVP* expression analysis, floral buds from ‘Nanshan Tian Tao’ were sampled on October  
828 15, November 15, December 15, January 15, February 15, March 15 in 2016-2017. *PpLNK1*  
829 expression was measured in floral buds (blooming soon) from three global warming-sensitive  
830 accessions (‘Wu Yue Xian’, ‘Nanshan Tian Tao’, and ‘Li He Pan Tao’) and three global warming-  
831 insensitive accessions (‘Xinjiang Pan Tao’, ‘Wuhan 2’, and ‘Kashi 2’) at 2016 and 2017. For  
832 *PpAHP5*, the phloem (including cambium) was collected from two cultivars ‘Hunchun Tao’ (cold

833 resistant) and 'Nanshan Tian Tao' (cold sensitive) after 24 hours treatment under -28 °C  
834 refrigerator and following 21 °C incubation in water. For each sample, three biological replicates  
835 were used. Total RNA was extracted using an extraction kit (Aidlab, Beijing, China) and first-  
836 strand cDNA was synthesized with 1µg RNA using a FastQuant RT Kit (with gDNase) (TIANGEN,  
837 Beijing, China). Gene-specific primers were designed using Primer-BLAST software (National  
838 Center for Biotechnology Information, Maryland, USA). qRT-PCR was performed using a SYBR  
839 green I master kit (Roche Diagnostics, Indianapolis, USA) with the LightCycler System (Roche  
840 LightCycler 480, Indianapolis, USA), following the manufacturer's protocol. Relative expression  
841 levels were calculated using the  $2^{-\Delta\Delta CT}$  method. A  $\beta$ -actin was used as the reference gene.

842

### 843 **Global warming simulation experiment**

844 The global warming simulation experiment was performed in 2016-2017. Three peach cultivars  
845 (Nanshan Tian Tao, Hu Jing Mi Lu, and Maravila), each with two clones, were used as plant  
846 materials. For each cultivar, ~30 annual branches longer than 40 cm with floral buds were taken  
847 from each clone when the winter chill accumulation was ~900 chilling hours (0~7.2°C, excluding  
848 0°C). Branch cuttings were placed in water in greenhouse at 25°C and with a 16 h/8 h photoperiod,  
849 to simulate climate warming. The ratio of bud break was investigated daily, starting from the day  
850 that the branch cuttings were placed in the greenhouse. The floral buds, excluding the  
851 tegmentum, were collected weekly and frozen in liquid nitrogen. The sampled floral buds were  
852 used for qRT-PCR analyses following the protocol described above.

853

### 854 **Data access**

855 Raw sequence data have been deposited in the NCBI Short Read Archive (SRA) under  
856 accession SRP108113. SNPs and SVs in Variant Call Format (VCF) have been deposited into  
857 the Figshare database (SNPs:  
858 [https://figshare.com/articles/SNPs\\_for\\_263\\_peach\\_accessions/7636715](https://figshare.com/articles/SNPs_for_263_peach_accessions/7636715), SVs:  
859 [https://figshare.com/articles/SVs\\_for\\_peach\\_sequencing/7636721](https://figshare.com/articles/SVs_for_peach_sequencing/7636721)). All other relevant data are  
860 contained within the paper and available in supplementary files.

861

### 862 **Acknowledgements**

863 This work was supported by grants from the Agricultural Science and Technology Innovation  
864 Program (CAAS-ASTIP-2020-ZFRI-01), the National Natural Science Foundation of China  
865 (31572094), the Crop Germplasm Resources Conservation Project (2016NWB041), and the US

866 National Science Foundation (IOS-1339287 and IOS-1539831). We thank Prof. Jialong Yao from  
867 The Plant and Food Research Institute of New Zealand and Dr. Amandine Cornille from Université  
868 Paris-Sud for helpful suggestions in paper writing. We thank Dr. Yanling Wen from Beijing Institute  
869 of Genomics, Chinese Academy of Sciences for assistance in data visualization.

870 *Author contributions:* L.W., S.H., Z.F. and W.G. designed and managed the project; Y.L.,  
871 G.Z., X.Z., S.Z. and C.C. collected materials; Y.L., P.Z., J.G., X.W., and Q.Z. prepared and purified  
872 DNA samples; Y.L., K.C., and N.L. performed the data analyses; Y.L., T.D., J.W., L.G., Q.H., and  
873 W.F. performed phenotyping. Y.L. performed the molecular experiment. Y.L. and K. C. wrote the  
874 paper; L.W., Z.F., W.G., and S.H. revised the paper. All authors read and approved the final  
875 manuscript.

876

## 877 **References**

878 Alachiotis N, Pavlidis P. 2018. RAiSD detects positive selection based on multiple signatures of a  
879 selective sweep and SNP vectors. *Commun Biol* **1**: 79.

880 Blanquart F, Kaltz O, Nuismer SL, Gandon S. 2013. A practical guide to measuring local adaptation.  
881 *Ecol Lett* **16**: 1195-1205.

882 Bolger A, Scossa F, Bolger ME, Lanz C, Maumus F, Tohge T, Quesneville H, Alseekh S, Sørensen I,  
883 Lichtenstein G, et al. 2014. The genome of the stress-tolerant wild tomato species *Solanum*  
884 *pennellii*. *Nat Genet* **46**: 1034-1038.

885 Bolger AM, Lohse M, Usadel B. 2014. Trimmomatic: a flexible trimmer for Illumina sequence data.  
886 *Bioinformatics* **30**: 2114-2120.

887 Cao K, Zheng Z, Wang L, Liu X, Zhu G, Fang W, Cheng S, Zeng P, Chen C, Wang X, et al. 2014.  
888 Comparative population genomics reveals the domestication history of the peach, *Prunus persica*,  
889 and human influences on perennial fruit crops. *Genome Biol* **15**: 415.

890 Cao K, Zhou Z, Wang Q, Guo J, Zhao P, Zhu G, Fang W, Chen C, Wang X, Wang X, et al. 2016.  
891 Genome-wide association study of 12 agronomic traits in peach. *Nat Commu* **7**: 13246.

892 Chen X, Schulz-Trieglaff O, Shaw R, Barnes B, Schlesinger F, Källberg M, Cox AJ, Kruglyak S,  
893 Saunders CT. 2016. Manta: rapid detection of structural variants and indels for germline and  
894 cancer sequencing applications. *Bioinformatics* **32**: 1220-1222.

895 Chiang C, Layer RM, Faust GG, Lindberg MR, Rose DB, Garrison EP, Marth GT, Quinlan AR, Hall IM.  
896 2015. SpeedSeq: ultra-fast personal genome analysis and interpretation. *Nat Methods* **12**: 966-  
897 968.

898 Cingolani P, Platts A, Wang L, Coon M, Nguyen T, Wang L, Land SJ, Lu X, Ruden DM. 2012. A program  
899 for annotating and predicting the effects of single nucleotide polymorphisms, SnpEff. *Fly* **6**: 80.

900 Danecek P, Auton A, Abecasis G, Albers CA, Banks E, DePristo MA, Handsaker RE, Lunter G, Marth  
901 GT, Sherry ST. 2011. The variant call format and VCFtools. *Bioinformatics* **27**: 2156-2158.

902 DePristo MA, Banks E, Poplin R, Garimella KV, Maguire JR, Hartl C, Philippakis AA, del Angel G, Rivas

- 903 MA, Hanna M, et al. 2011. A framework for variation discovery and genotyping using next-  
904 generation DNA sequencing data. *Nat Genet* **43**: 491-498.
- 905 Falchi R, Vendramin E, Zanon L, Scalabrin S, Cipriani G, Verde I, Vizzotto G, Morgante M. 2013. Three  
906 distinct mutational mechanisms acting on a single gene underpin the origin of yellow flesh in  
907 peach. *Plant J* **76**: 75-87.
- 908 Fan S, Bielenberg DG, Zhebentyayeva TN, Reighard GL, Okie WR, Holland D, Abbott AG. 2010.  
909 Mapping quantitative trait loci associated with chilling requirement, heat requirement and bloom  
910 date in peach (*Prunus persica*). *New Phytol* **185**: 917-930.
- 911 Felsenstein J. 1989. PHYLIP-phylogeny inference package (version 3.2). *Cladistics* **5**: 164-166.
- 912 Ferrer JL, Jez JM, Bowman ME, Dixon RA, Noel JP. 1999. Structure of chalcone synthase and  
913 the molecular basis of plant polyketide pathway. *Nat Struct Biol* **6**: 775-784.
- 914 Fournier-Level A, Korte A, Cooper MD, Nordborg M, Schmitt J, Wilczek AM. 2011. A map of local  
915 adaptation in *Arabidopsis thaliana*. *Science* **334**: 83-86.
- 916 Frazee AC, Perteza G, Jaffe AE, Langmead B, Salzberg SL, Leek JT. 2015. Ballgown bridges the gap  
917 between transcriptome assembly and expression analysis. *Nat Biotech* **33**: 243-246.
- 918 Hancock AM, Brachi B, Faure N, Horton MW, Jarymowycz LB, Sperone FG, Toomajian C, Roux F,  
919 Bergelson J. 2011. Adaptation to climate across the *Arabidopsis thaliana* genome. *Science* **334**:  
920 83-86.
- 921 Hara K, Yokoo T, Kajita R, Onishi T, Yahata S, Peterson KM, Torii KU, Kakimoto T. 2009. Epidermal  
922 cell density is autoregulated via a secretory peptide, EPIDERMAL PATTERNING FACTOR 2 in  
923 *Arabidopsis* leaves. *Plant Cell Physiol* **50**: 1019-1031.
- 924 Harter RD. 1983. Effect of soil pH on adsorption of lead, copper, zinc, and nickel. *Soil Sci Soc Am J*  
925 **47**: 47-51.
- 926 Hu Y, Jiang L, Wang W, Yu D. 2013. Jasmonate regulates the INDUCER OF CBF EXPRESSION–C-  
927 REPEAT BINDING FACTOR/DRE BINDING FACTOR1 Cascade and freezing tolerance  
928 in *Arabidopsis*. *Plant Cell* **25**: 2907-2924.
- 929 Huang DW, Sherman BT, Lempicki RA. 2009. Systematic and integrative analysis of large gene lists  
930 using DAVID Bioinformatics Resources. *Nat Protoc* **4**: 44-57.
- 931 Jeffares DC, Jolly C, Hoti M, Speed D, Shaw L, Rallis C, Balloux F, Dessimoz C, Bähler J, Sedlazeck  
932 FJ. 2017. Transient structural variations have strong effects on quantitative traits and reproductive  
933 isolation in fission yeast. *Nat Commun* **8**: 14061.
- 934 Jeon J, Kim J. 2013. *Arabidopsis* response regulator1 and *Arabidopsis* histidine phosphotransfer  
935 protein2 (AHP2), AHP3, and AHP5 function in cold signaling. *Plant Physiol* **161**: 408-424.
- 936 Kim D, Langmead B, Salzberg SL. 2015. HISAT: a fast spliced aligner with low memory requirements.  
937 *Nat Methods* **12**: 357-360.
- 938 Kobashi K, Gemma H, Iwahori S. 2000. Abscisic acid content and sugar metabolism of peaches grown  
939 under water stress. *J Amer Soc Hort Sci* **125**: 425-428.
- 940 Kobashi K, Sugaya S, Gemma H, Iwahori S. 2001. Effect of abscisic acid (ABA) on sugar accumulation  
941 in the flesh tissue of peach fruit at the start of the maturation stage. *Plant Growth Regul* **35**: 215-

- 942 223.
- 943 Lasky JR, Upadhyaya HD, Ramu P, Deshpande S, Hash CT, Bonnette J, Juenger TE, Hyma K,  
944 Acharya C, Mitchell SE. 2015. Genome-environment associations in sorghum landraces predict  
945 adaptive traits. *Sci Adv* **1**: e1400218.
- 946 Lastdrager J, Hanson J, Smeeckens S. 2014. Sugar signals and the control of plant growth and  
947 development. *J Exp Bot* **65**: 799-807.
- 948 Li H, Durbin R. 2009. Fast and accurate short read alignment with Burrows-Wheeler transform.  
949 *Bioinformatics* **25**: 1754-1760.
- 950 Li H, Durbin R. 2011. Inference of human population history from individual whole-genome  
951 sequences. *Nature* **475**: 493-496.
- 952 Li H, Handsaker B, Wysoker A, Fennell T, Ruan J, Homer N, Marth G, Abecasis G, Durbin R, 1000  
953 Genome Project Data Processing Subgroup. 2009. The sequence alignment/map format and  
954 SAMtools. *Bioinformatics* **25**: 2078-2079.
- 955 Li J, Oulee TM, Raba R, Amundson RG, Last RL. 1993. *Arabidopsis* Flavonoid Mutants Are  
956 Hypersensitive to UV-B Irradiation. *Plant Cell* **5**: 71-179.
- 957 Li Y, Cao K, Zhu G, Fang W, Chen C, Wang X, Zhao P, Guo J, Ding T, Guan L, et al. 2019. Genomic  
958 analyses of an extensive collection of wild and cultivated accessions provide new insights into  
959 peach breeding history. *Genome Biol* **20(1)**: 36.
- 960 Li Y, Wang L, Zhu G, Fang W, Cao K, Chen C, Wang X, Wang, X. (2016). Phenological response of  
961 peach to climate change exhibits a relatively dramatic trend in China, 1983-2012. *Sci Horti-*  
962 *Amsterda* **209**:192-200.
- 963 Li Z, Reighard GL, Abbott AG, Bielenberg DG. 2009. Dormancy-associated MADS genes from the  
964 *EVG* locus of peach [*Prunus persica* (L.) Batsch] have distinct seasonal and photoperiodic  
965 expression patterns. *J Exp Bot* **60**: 3521-3530.
- 966 Ma Q, Sun M, Lu J, Liu Y, Hu D, Hao Y. 2017. Transcription factor AREB2 is involved in soluble  
967 sugar accumulation by activating sugar transporter and amylase genes. *Plant Physio* **174**:  
968 2348–2362.
- 969 Martínez-García PJ, Parfitt DE, Ogundiwin EA, Fass J, Chan HM, Ahmad R, Lurie S, Dandekar A,  
970 Gradziel TM, Crisosto CH. 2013. High density SNP mapping and QTL analysis for fruit quality  
971 characteristics in peach (*Prunus persica* L.). *Tree Genet & Genomes* **9**: 9-36.
- 972 McKenna A, Hanna M, Banks E, Sivachenko A, Cibulskis K, Kernytsky A, Garimella K, Altshuler D,  
973 Gabriel S, Daly M, et al. 2010. The Genome Analysis Toolkit: a MapReduce framework for  
974 analyzing next-generation DNA sequencing data. *Genome Research* **20**: 1297-1303.
- 975 Menzel A, Sparks TH, Estrella N, Koch E, Aasa A, Ahas P, Alm-Kubler K, Bissolli P, Braslavska O,  
976 Briede A, et al. 2006. European phenological response to climate change matches the warming  
977 pattern. *Glob Chang Biol* **12**: 1969-1976.
- 978 Mikkelsen MD, Thomashow MF. 2009. A role for circadian evening elements in cold-regulated gene  
979 expression in *Arabidopsis*. *Plant J* **60**: 328-339.
- 980 Monihan SM, Magness CA, Yadegari R, Smith SE, Schumaker KS. 2016. *Arabidopsis* CALCINEURIN

- 981 B-LIKE10 functions independently of the SOS pathway during reproductive development in saline  
982 conditions. *Plant Physio* **171**: 369-379.
- 983 Murray M, Thompson WF. 1980. Rapid isolation of high molecular weight plant DNA. *Nucleic Acids*  
984 *Res* **8**: 4321-4326.
- 985 Perteu M, Kim D, Perteu G, Leek JT, Salzberg SL. 2016. Transcript-level expression analysis of RNA-  
986 seq experiments with HISAT, StringTie and Ballgown. *Nat Protoc* **11**: 1650-1667.
- 987 Perteu ML, Perteu GM, Antonescu CM, Chang TC, Mendell JT, Salzberg SL. 2015. StringTie enables  
988 improved reconstruction of a transcriptome from RNA-seq reads. *Nat Biotech* **33**: 290-295.
- 989 Price AL, Patterson NJ, Plenge RM, Weinblatt ME, Shadick NA, Reich D. 2006. Principal components  
990 analysis corrects for stratification in genome-wide association studies. *Na Genet* **38**: 904-909.
- 991 Pritchard J, Di Rienzo A. 2010. Adaptation-not by sweeps only. *Nat Rev Genet* **11**: 665-667.
- 992 Rugnone ML, Faigón Soverna A, Sanchez SE, Schlaen RG, Hernando CE, Seymour DK, Mancini E,  
993 Chernomoretz A, Weigel D, Más P, et al. 2013. *LNK* genes integrate light and clock signaling  
994 networks at the core of the *Arabidopsis* oscillator. *Proc Natl Acad Sci U S A* **110**: 12120-12125.
- 995 Sasaki R, Yamane H, Ooka T, Jotatsu H, Kitamura Y, Akagi T, Tao R. 2011. Functional and expressional  
996 analyses of *PmDAM* genes associated with endodormancy in Japanese apricot. *Plant Physiol*  
997 **157**: 485-497.
- 998 Seguel A, Cumming JR, Klugh-Stewart K, Cornejo P, Borie F. 2013. The role of arbuscular mycorrhizas  
999 in decreasing aluminium phytotoxicity in acidic soils: a review. *Mycorrhiza* **23**: 167-183.
- 1000 Tang H, Peng J, Wang P, Risch N. 2005. Estimation of individual admixture: analytical and study design  
1001 considerations. *Genet Epidemiol* **28**: 289-301.
- 1002 Tim W, Braun JV. 2013. Climate change impacts on global food security. *Science* **341**: 508-513.
- 1003 Tobias R, Zichner T, Schlattl A, Stütz AM, Benes V, Korbel JO. 2012. Delly: structural variant discovery  
1004 by integrated paired-end and split-read analysis. *Bioinformatics* **28**: i333-i339.
- 1005 Verde I, Abbott AG, Scalabrin S, Jung S, Shu S, Marroni F, Zhebentyayeva T, Dettori MT, Grimwood  
1006 J, Cattonaro F, et al. 2013. The high-quality draft genome of peach (*Prunus persica*) identifies  
1007 unique patterns of genetic diversity, domestication and genome evolution. *Nat Genet* **45**: 487-494.
- 1008 Wang J, Ding J, Tan B, Robinson KM, Michelson IH, Johansson A, Nystedt B, Scofield DG, Nilsson O,  
1009 Jansson S, Street NR, et al. 2018. A major locus controls local adaptation and adaptive life history  
1010 variation in a perennial plant. *Genome Bio* **19**: 72.
- 1011 Wang L, Zhu GR, Fang WC. 2012. *Peach genetic resource in China*. China Agriculture Press.
- 1012 Yan W, Liu H, Zhou X, Li Q, Zhang J, Lu L, Liu T, Liu H, Zhang C, Zhang Z, et al. 2013. Natural variation  
1013 in *Ghd7.1* plays an important role in grain yield and adaptation in rice. *Cell Res* **23(7)**: 969-971.
- 1014 Zhang Q, Chen W, Sun L, Zhao F, Huang B, Yang W, Tao Y, Wang J, Yuan Z, Fan G, et al. (2012). The  
1015 genome of *Prunus mume*. *Nat Commun* **3**: 1318.
- 1016 Zheng Y, Crawford GW, Chen X. 2014. Archaeological evidence for peach (*Prunus persica*) cultivation  
1017 and domestication in China. *PLoS ONE* **9**: e106595.
- 1018 Zhou X, Stephens M. 2012. Genome-wide efficient mixed-model analysis for association studies. *Nat*  
1019 *Genet* **44**: 821-824.
